# Supplementary material for: MicroRNA expression profiling of human breast cancer identifies new markers of tumor subtype
Source: PubMed Central journal article supplement (PMC2246288; doi:10.1186/gb-2007-8-10-r214), 2007-10-08

**miR-18a (r=0.6)**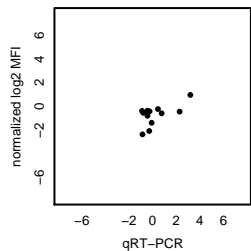**miR-196a (r=0.66)**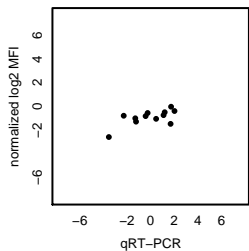**miR-10b (r=0.63)**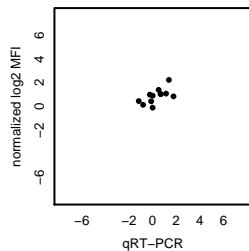**miR-143 (r=-0.26)**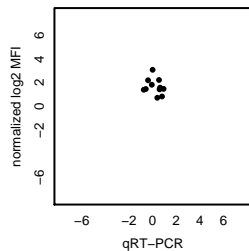**miR-25 (r=0.81)**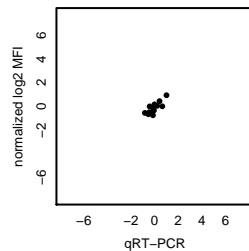**miR-21 (r=0.011)**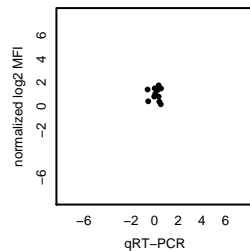**miR-155 (r=0.64)**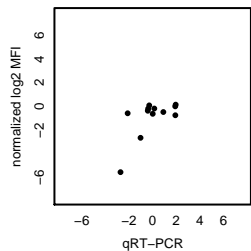**miR-187 (r=0.22)**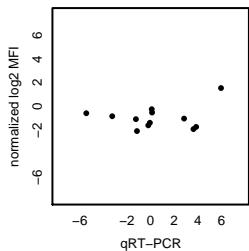**miR-7 (r=0.49)**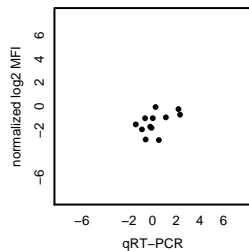**let-7a (r=0.31)**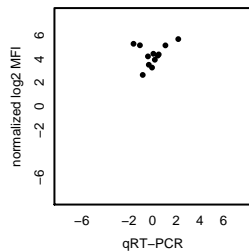**miR-210 (r=0.85)**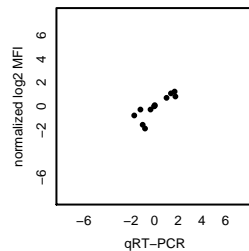**miR-122a (r=0.20)**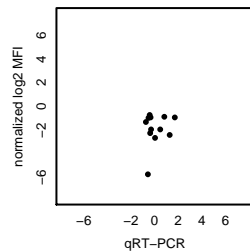**miR-150 (r=0.61)**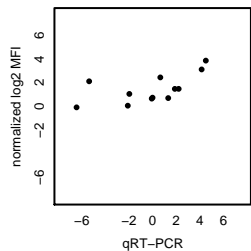**miR-30e-3p (r=0.47)**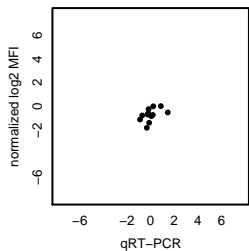**miR-29c (r=0.16)**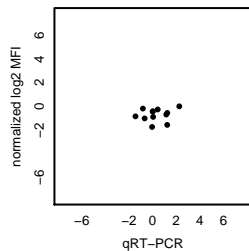**let-7b (r=0.8)**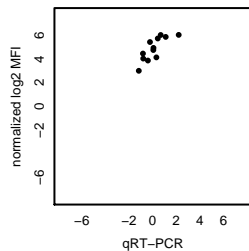

Supplement: gb-2007-8-10-r214-S7.pdf [file gb-2007-8-10-r214-S7.pdf]
