# Supplementary material for: MicroRNA expression profiling of human breast cancer identifies new markers of tumor subtype
Source: PubMed Central journal article supplement (PMC2246288; doi:10.1186/gb-2007-8-10-r214), 2007-10-08

Chr 1 (+)

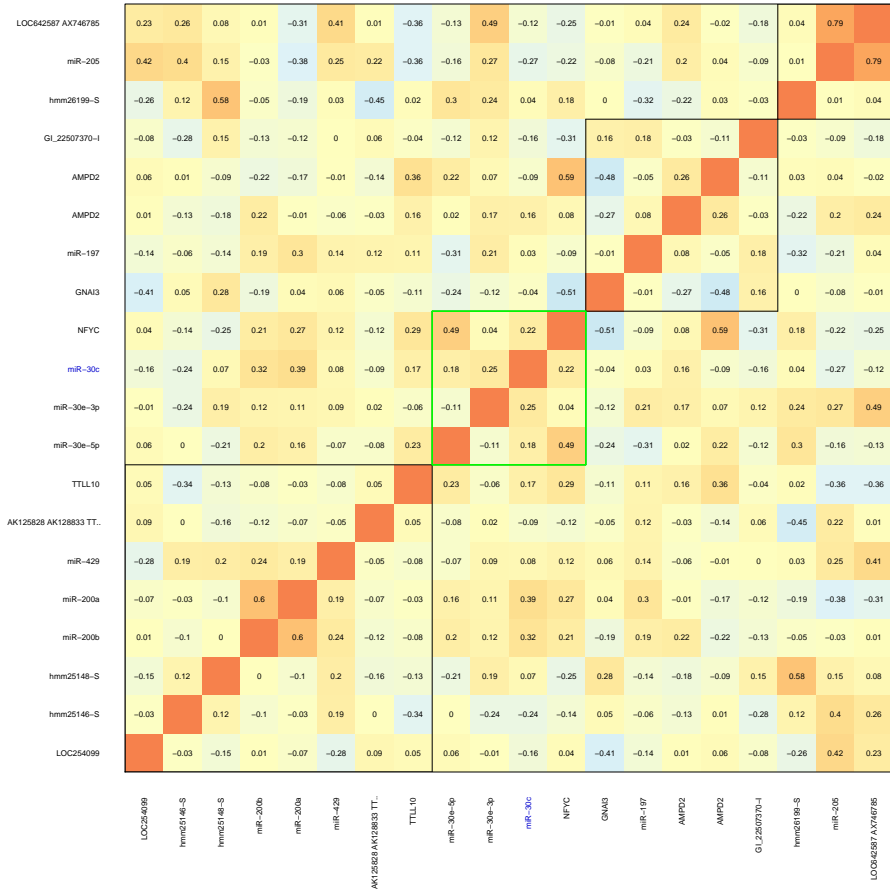

Chr 1 (-)

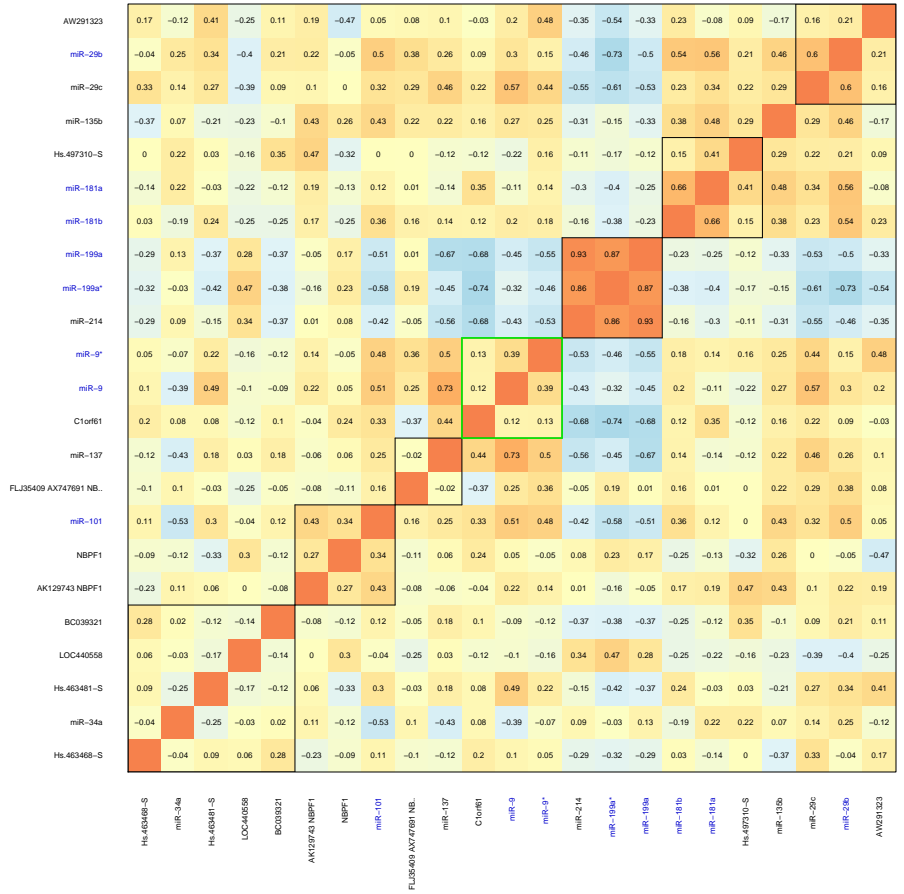

Chr 2 (+)

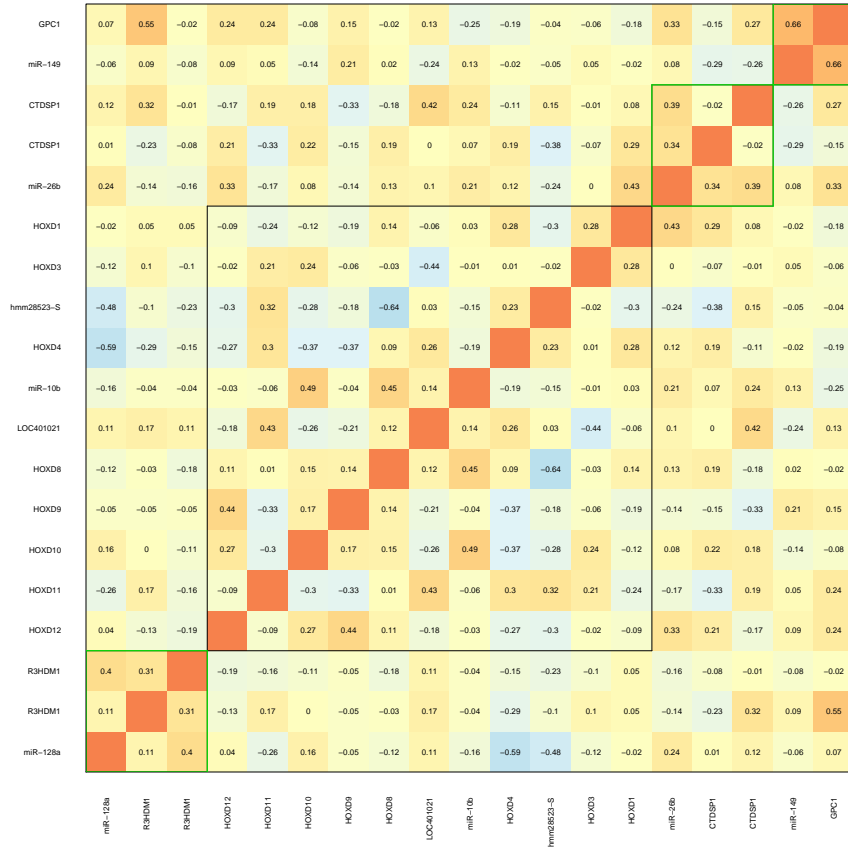

Chr 2 (-)

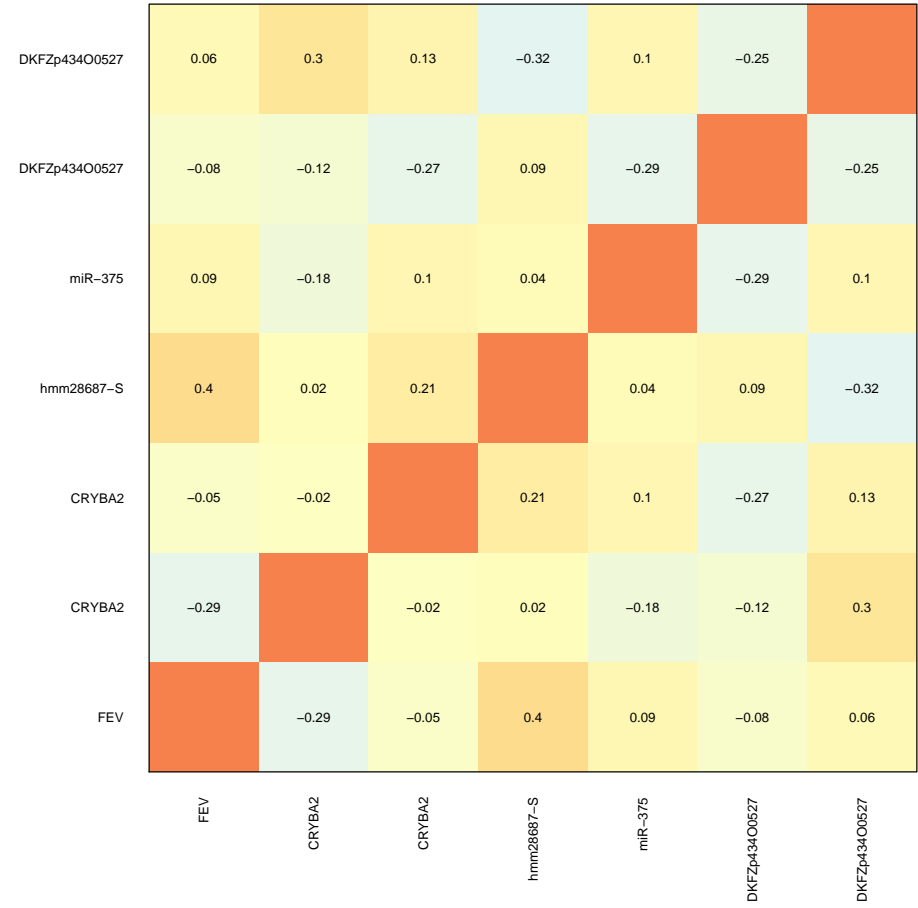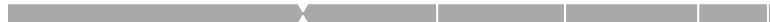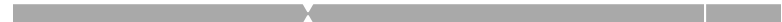

Chr 3 (+)

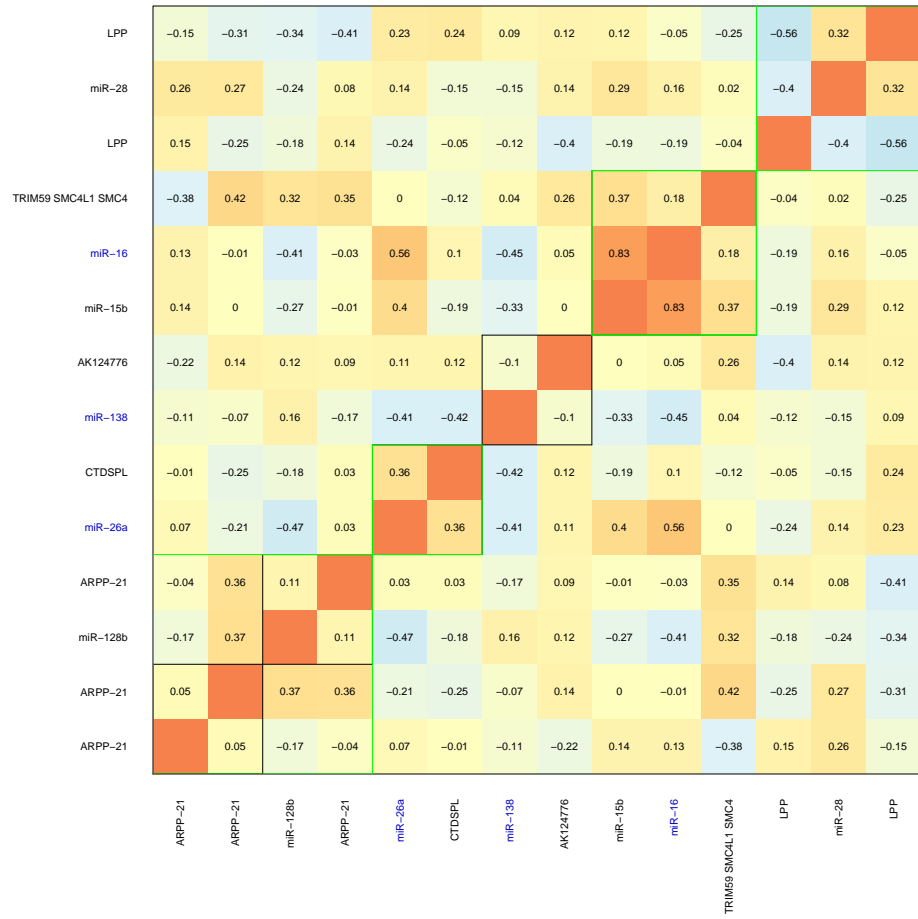

Chr 3 (-)

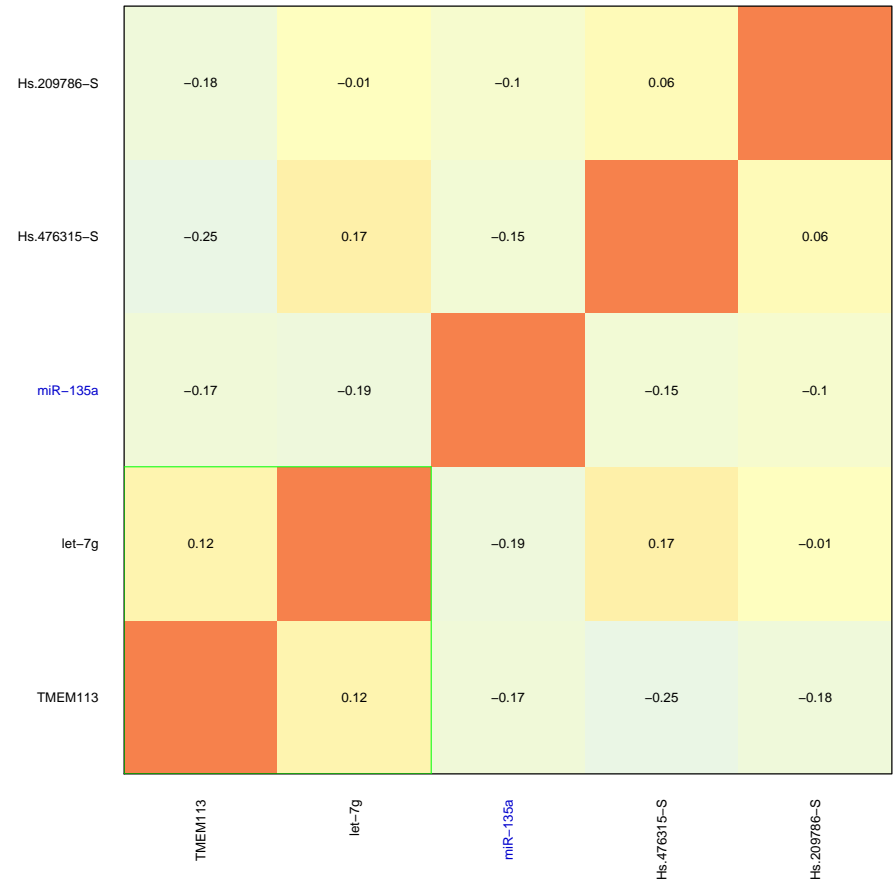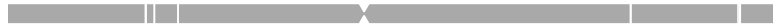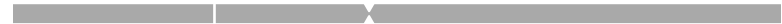

Chr 4 (+)

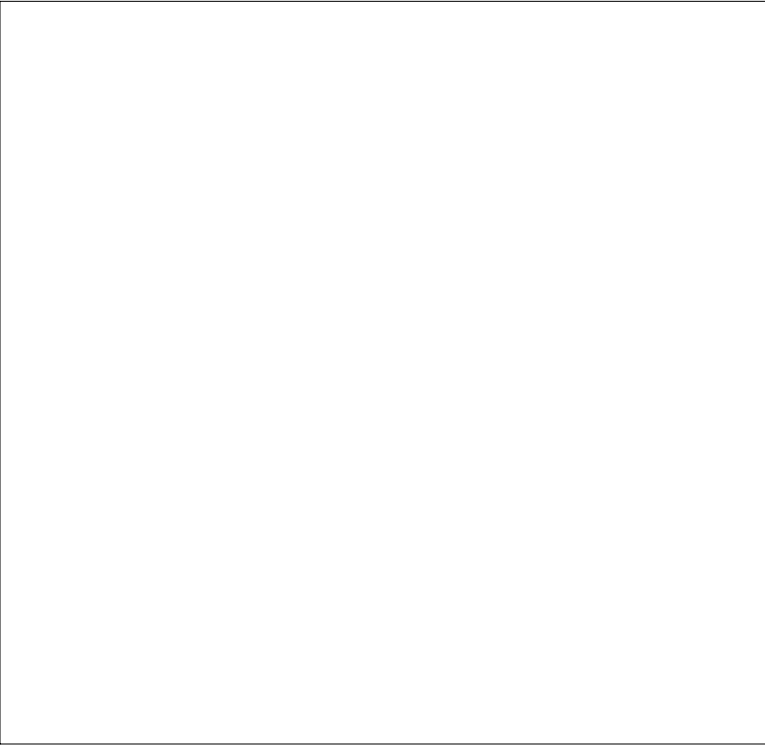

Chr 4 (-)

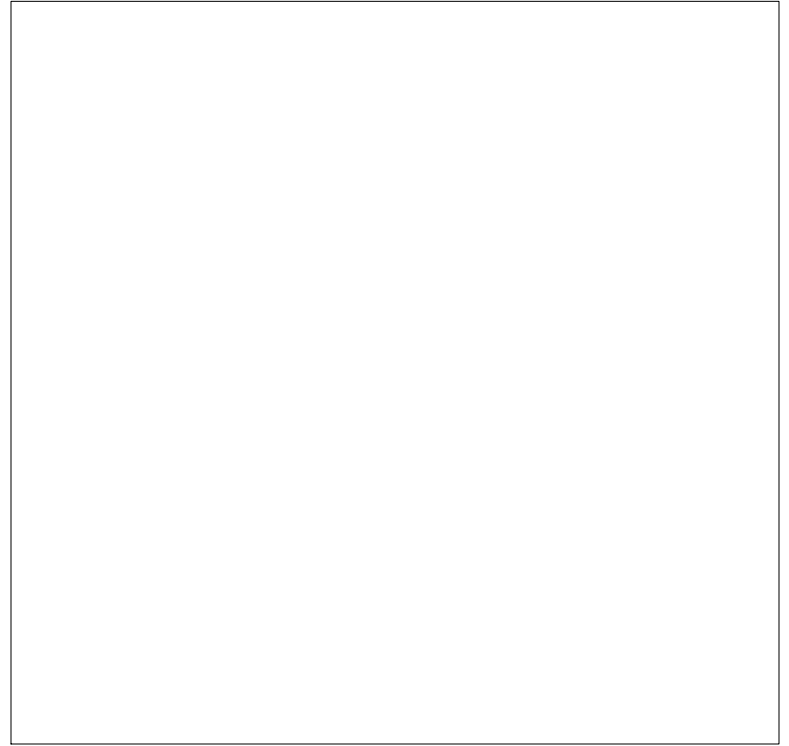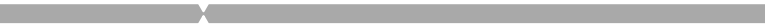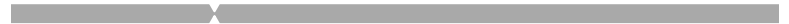

Chr 5 (+)

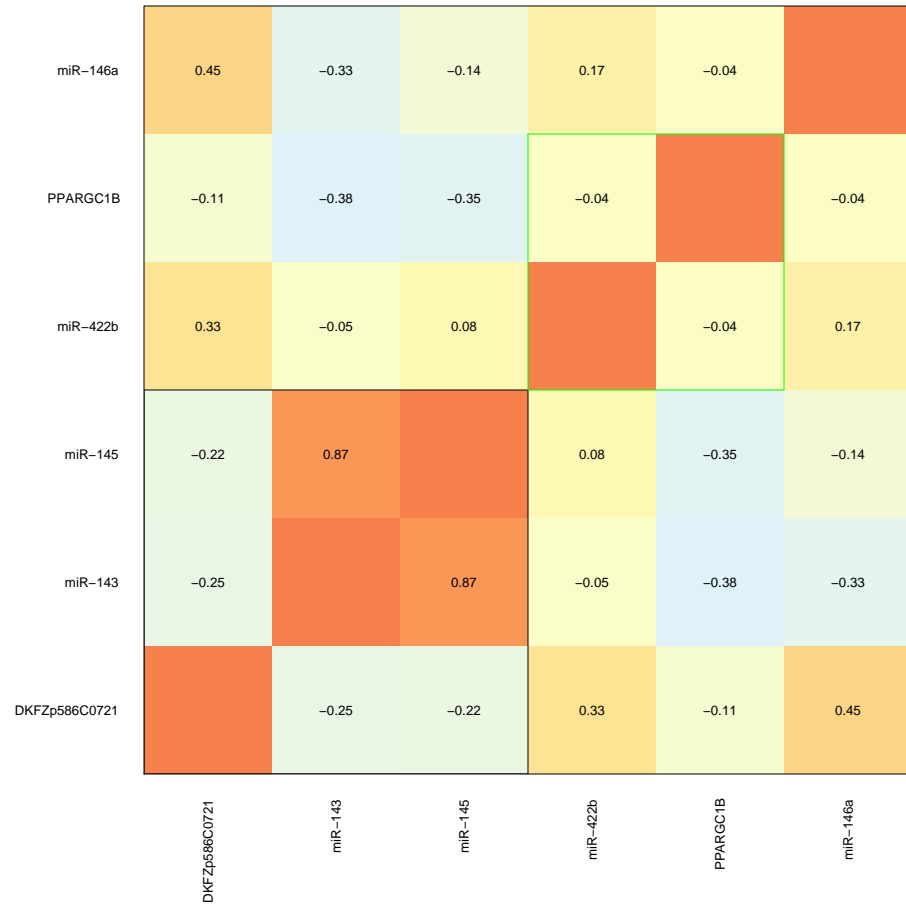

Chr 5 (-)

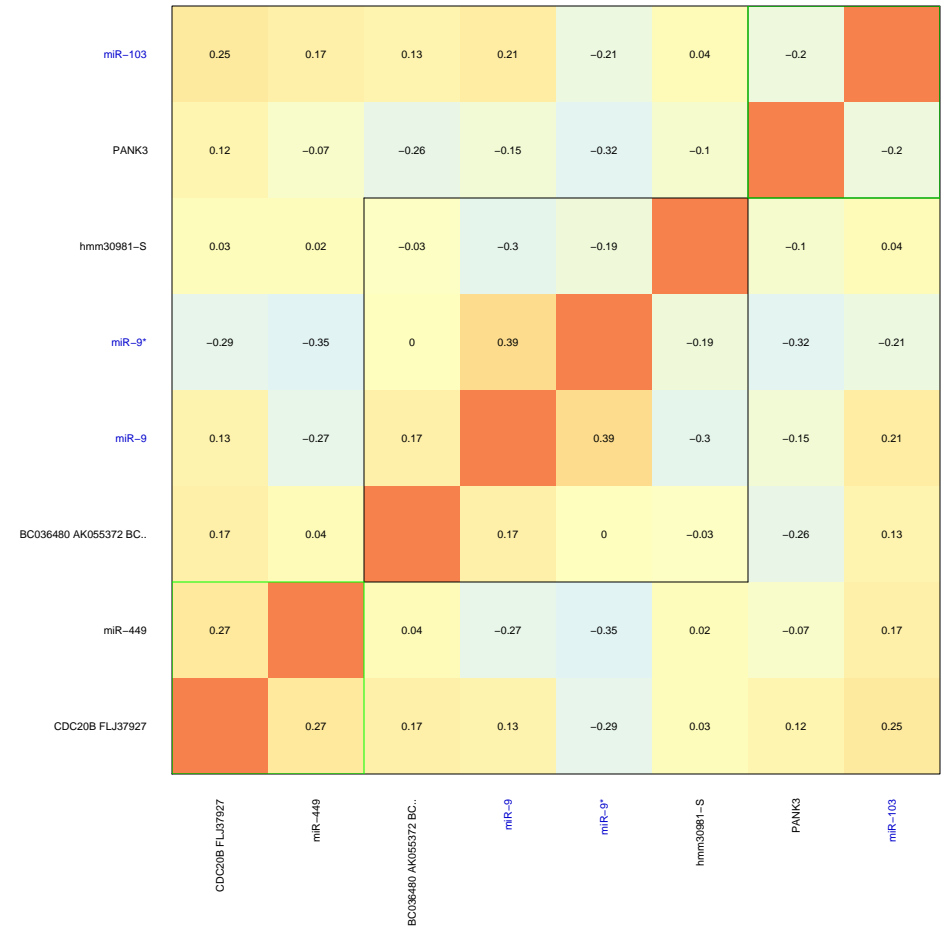

Chr 6 (+)

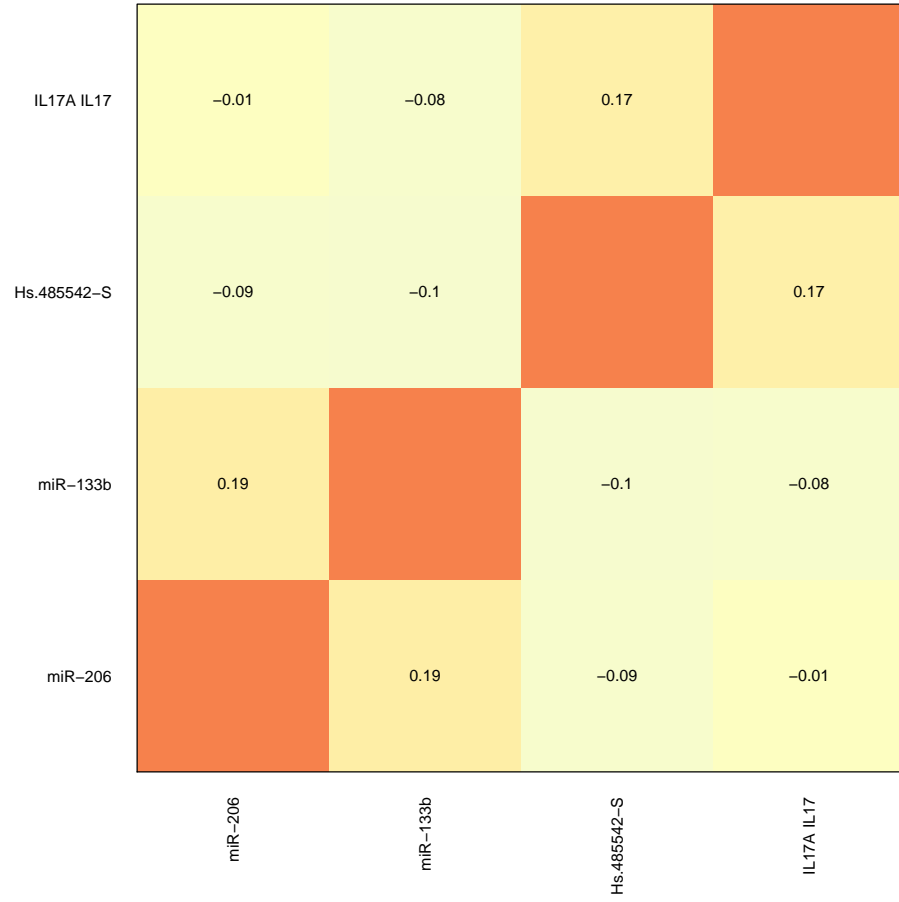

Chr 6 (-)

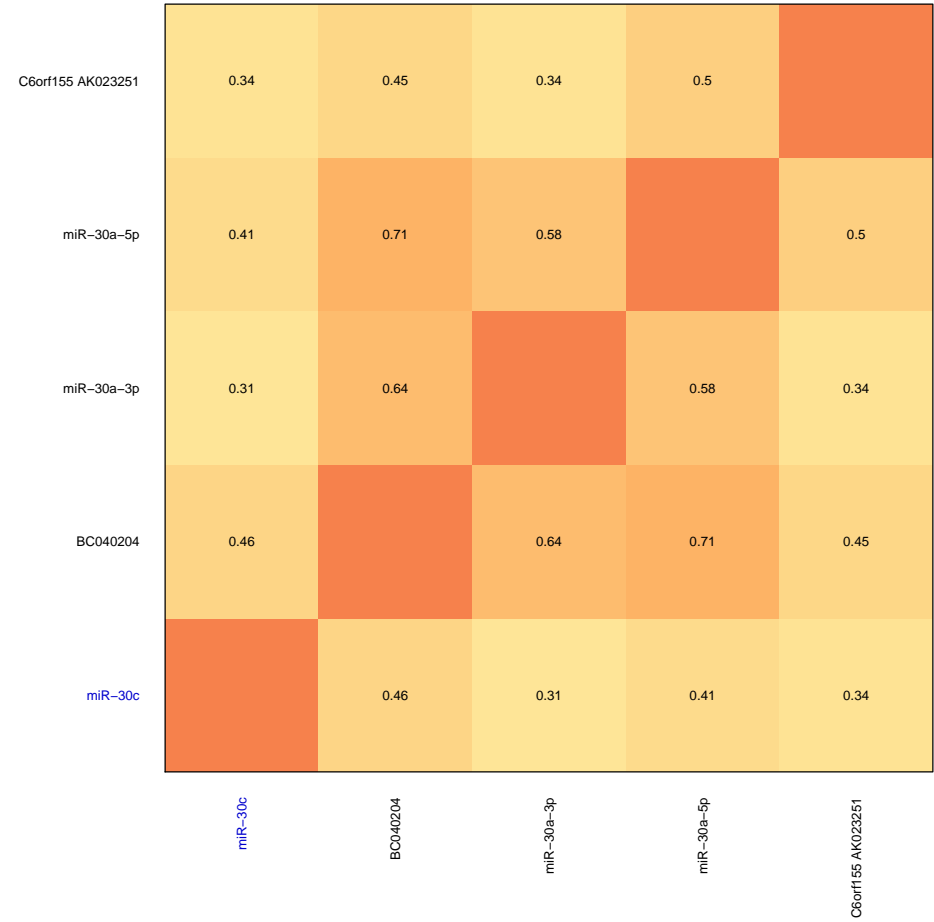

Chr 7 (+)

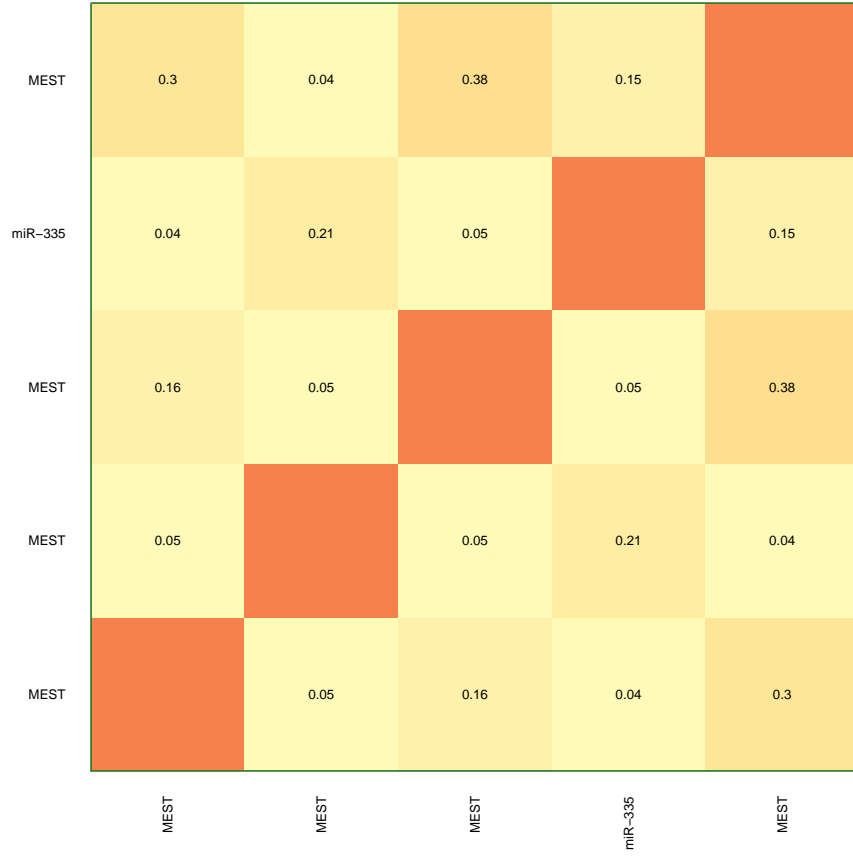

Chr 7 (-)

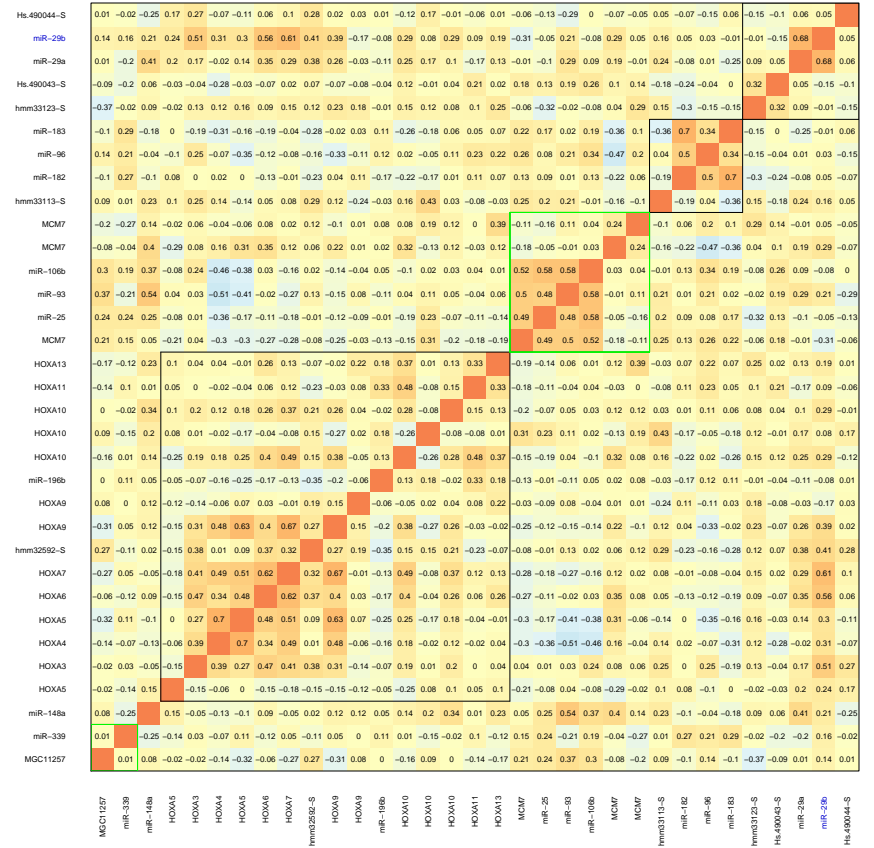

Chr 8 (+)

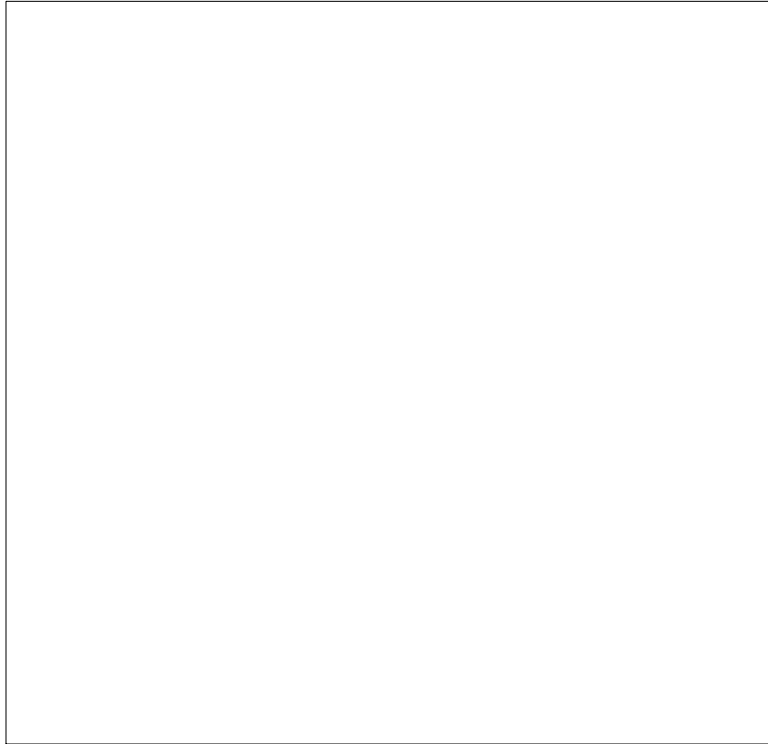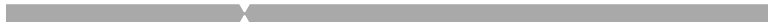

Chr 8 (-)

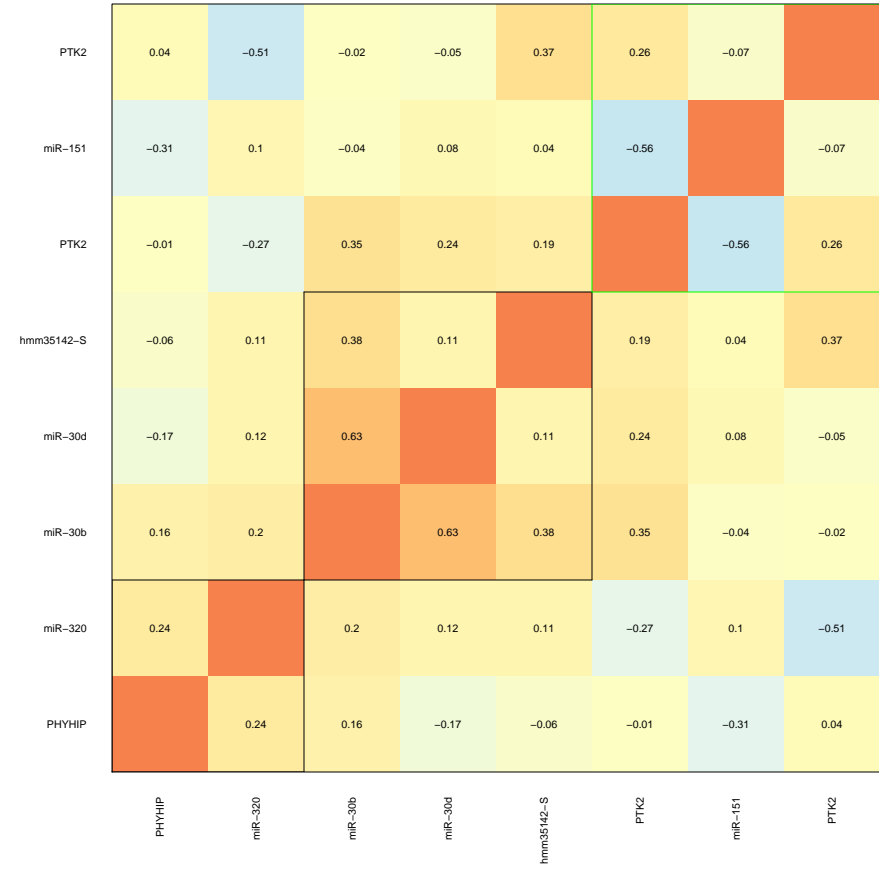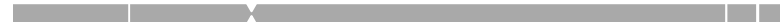



Chr 9 (+)

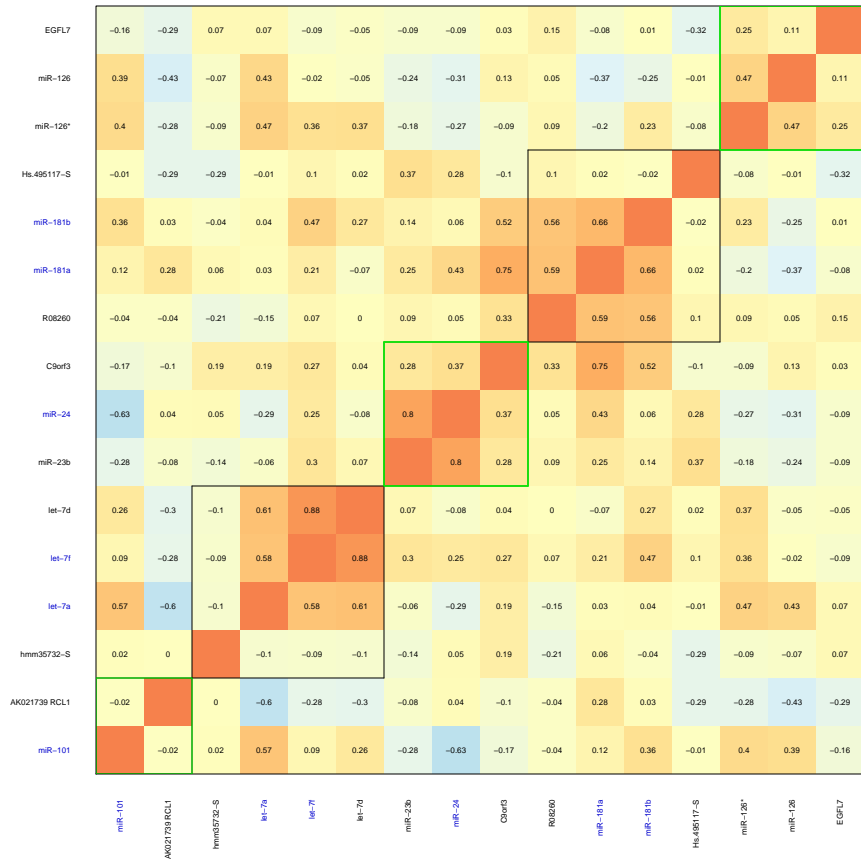

Chr 9 (-)

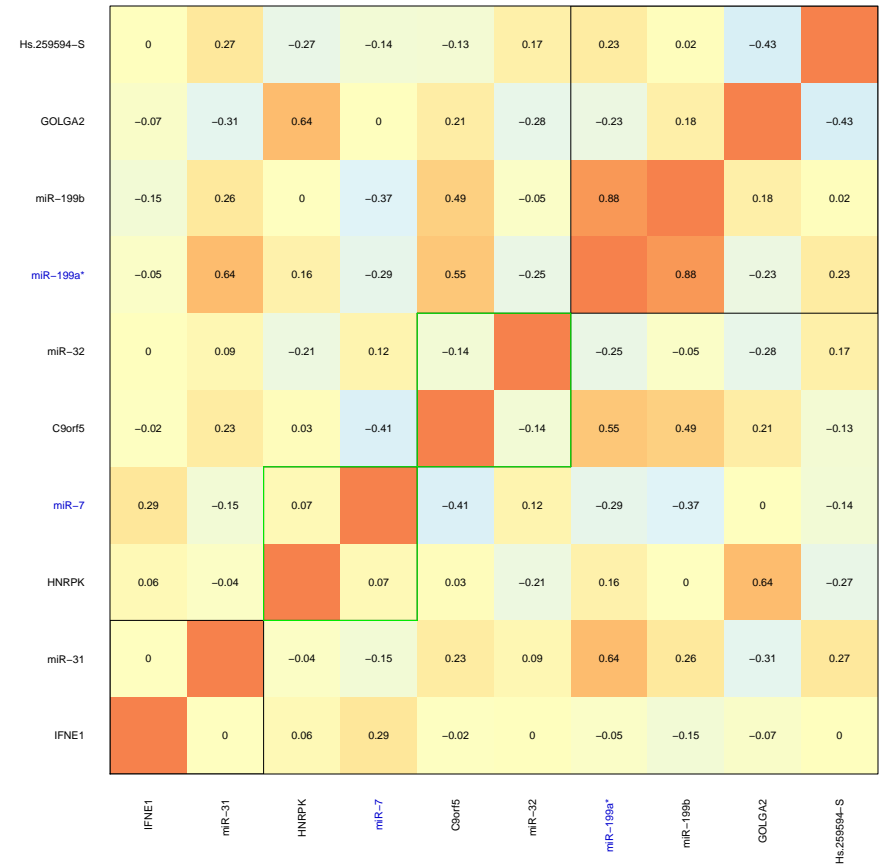

Chr 10 (+)

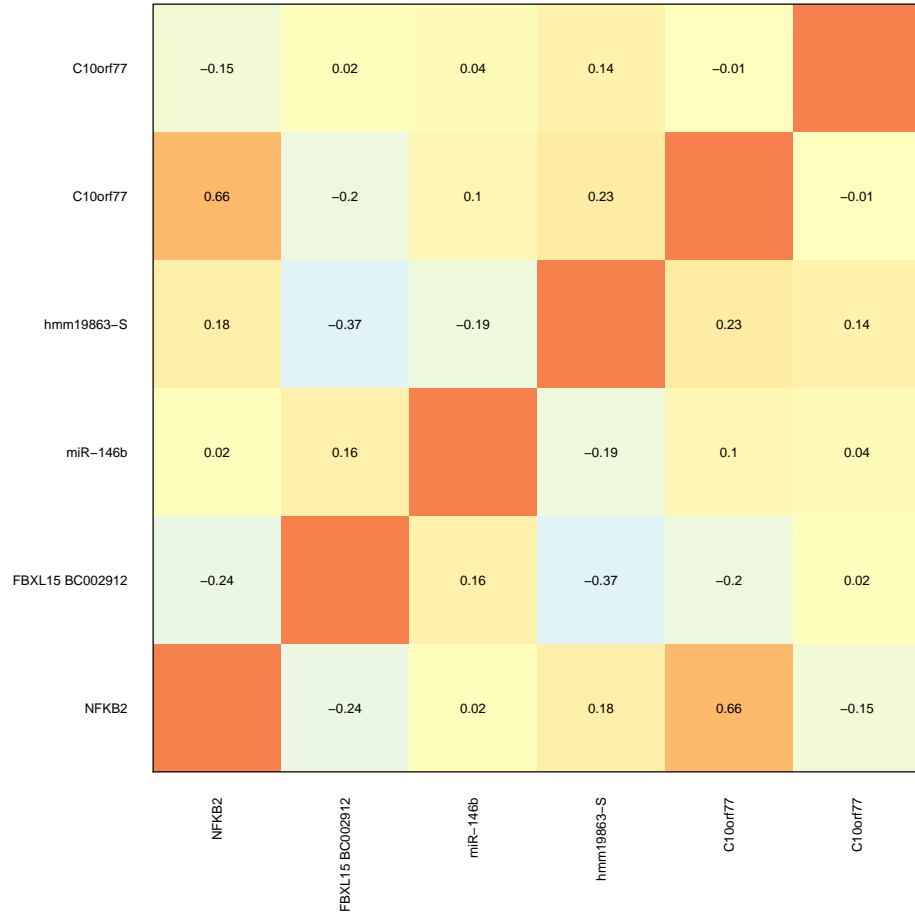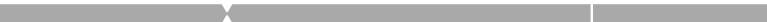

Chr 10 (-)

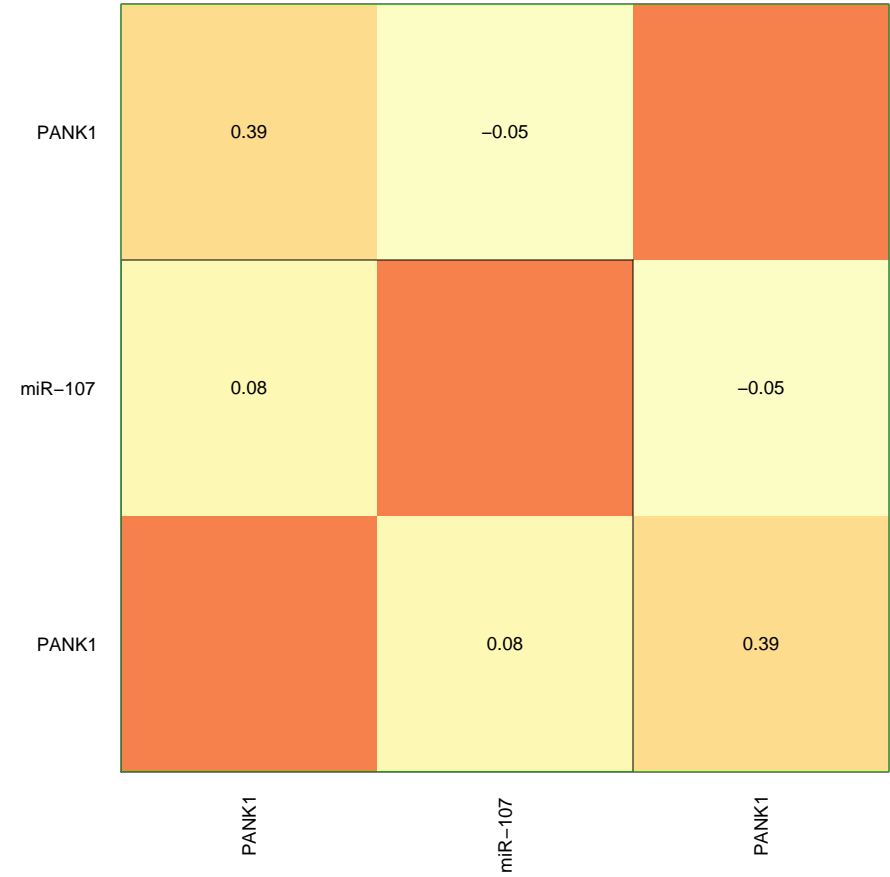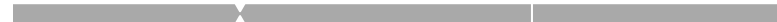

Chr 11 (+)

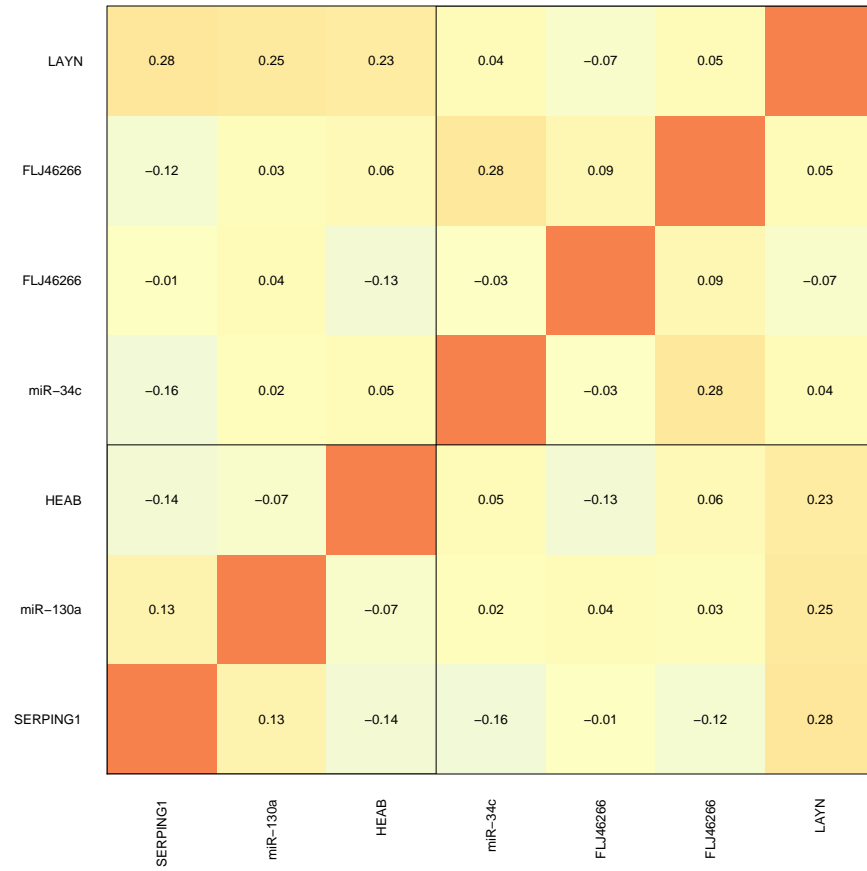

Chr 11 (-)

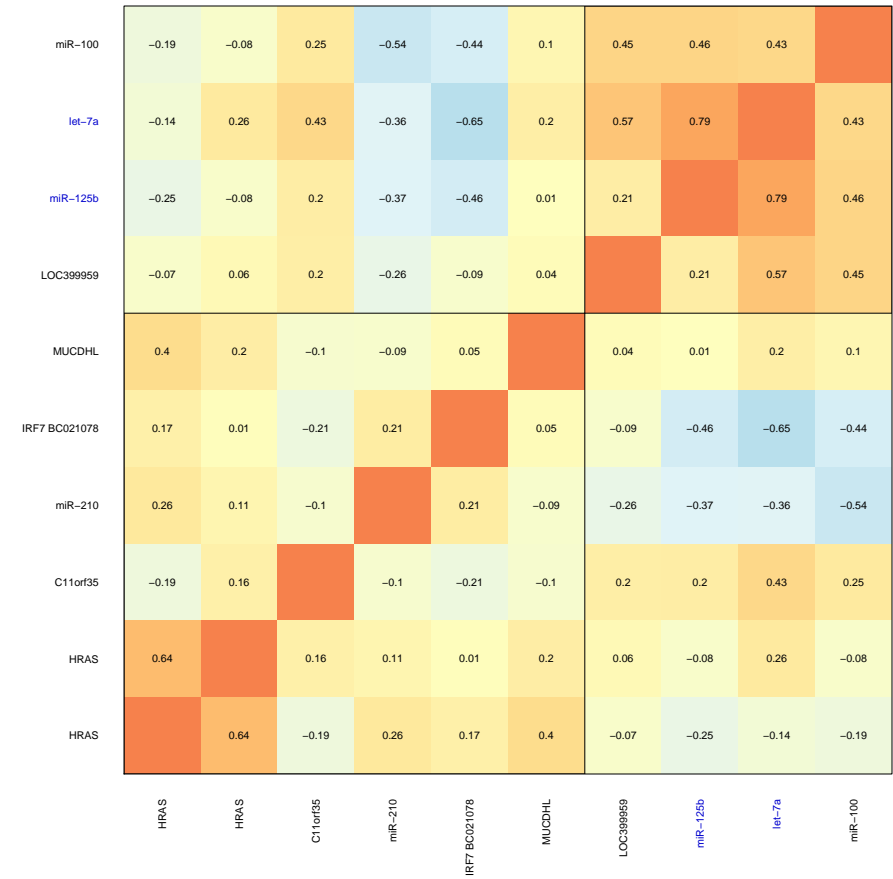

Chr 12 (+)

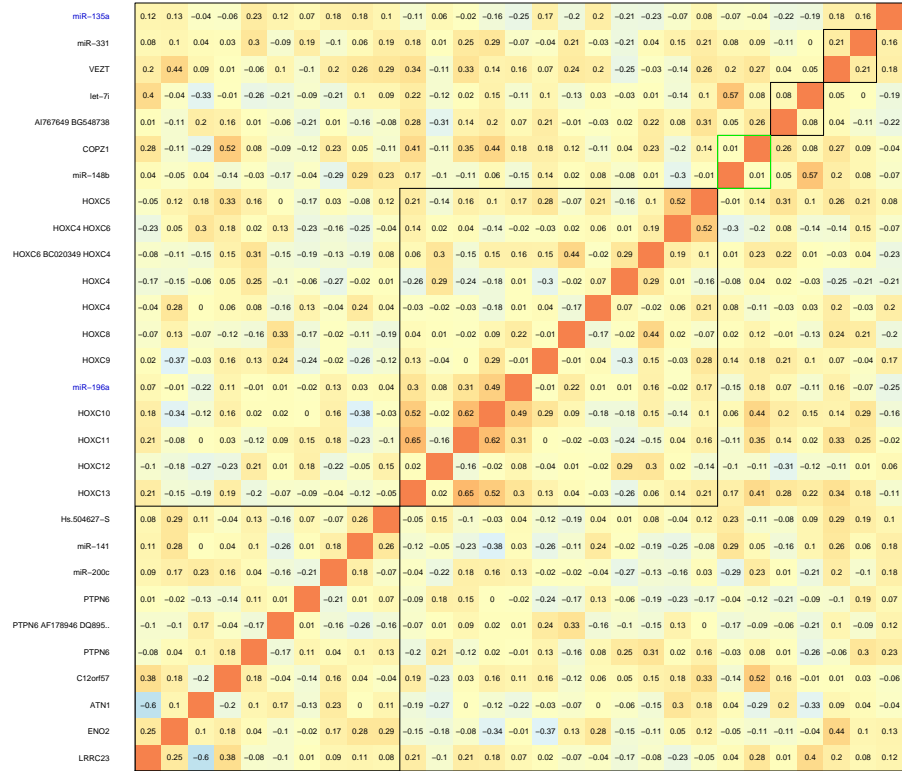

LRRC23  
ENO2  
ATN1  
C12orf57  
PTPN6  
PTPN6 AF178946 DQ895..  
PTPN6  
miR-200c  
miR-141  
Hs.504627-S  
HOXC13  
HOXC12  
HOXC11  
HOXC10  
miR-196a  
HOXC9  
HOXC8  
HOXC4  
HOXC4  
HOXC6 BC020349 HOXC4  
HOXC4 HOXC6  
HOXC5  
miR-148b  
COP21  
A176749 BG548738  
let-7f  
VETZ  
miR-331  
miR-135a

Chr 12 (-)

miR-26a

0.23

CTDSP2

0.23

CTDSP2

miR-26a

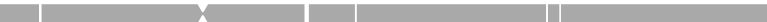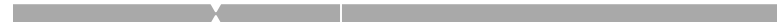

Chr 13 (+)

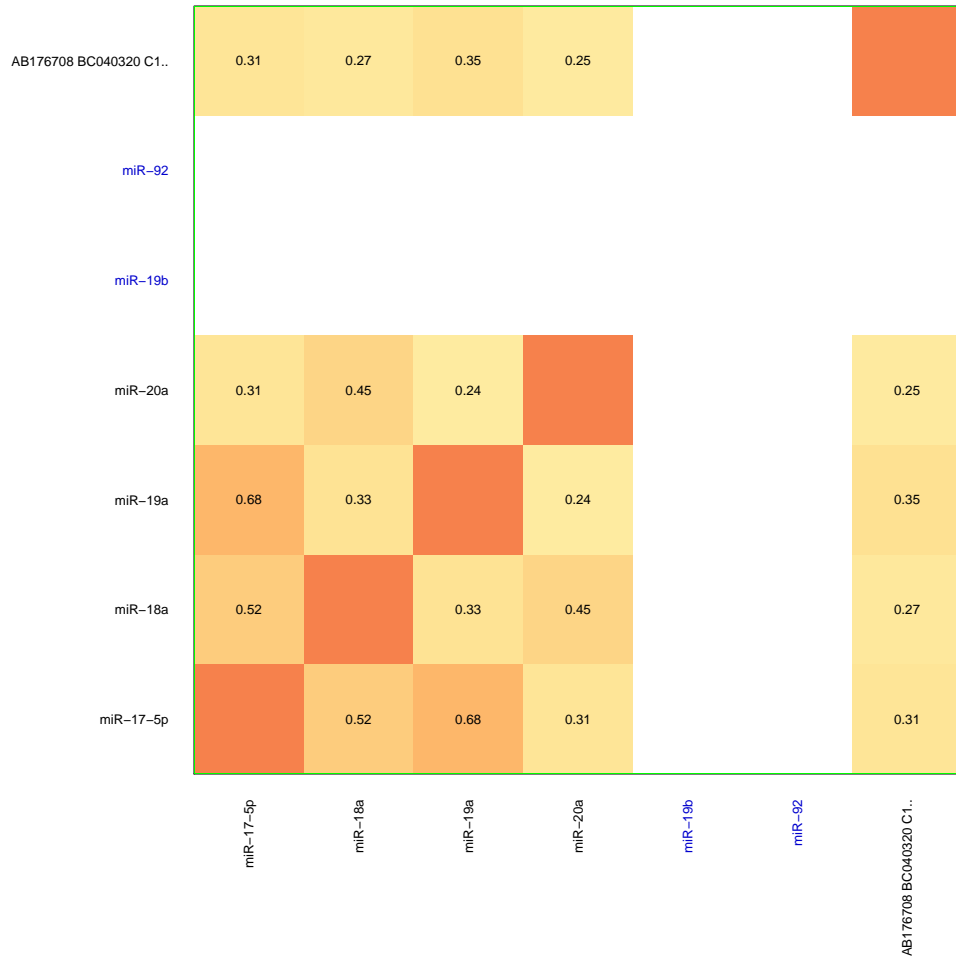

Chr 13 (-)

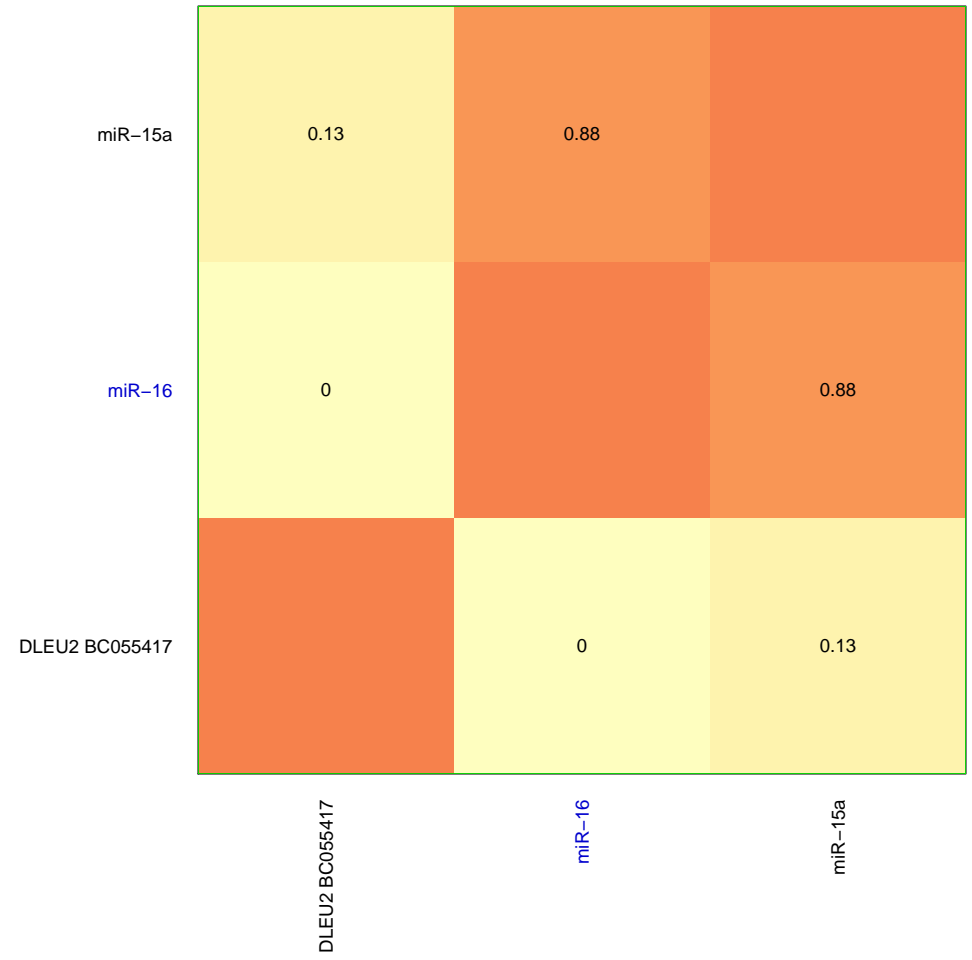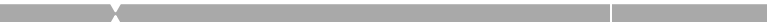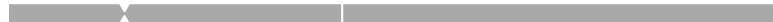

Chr 14 (+)

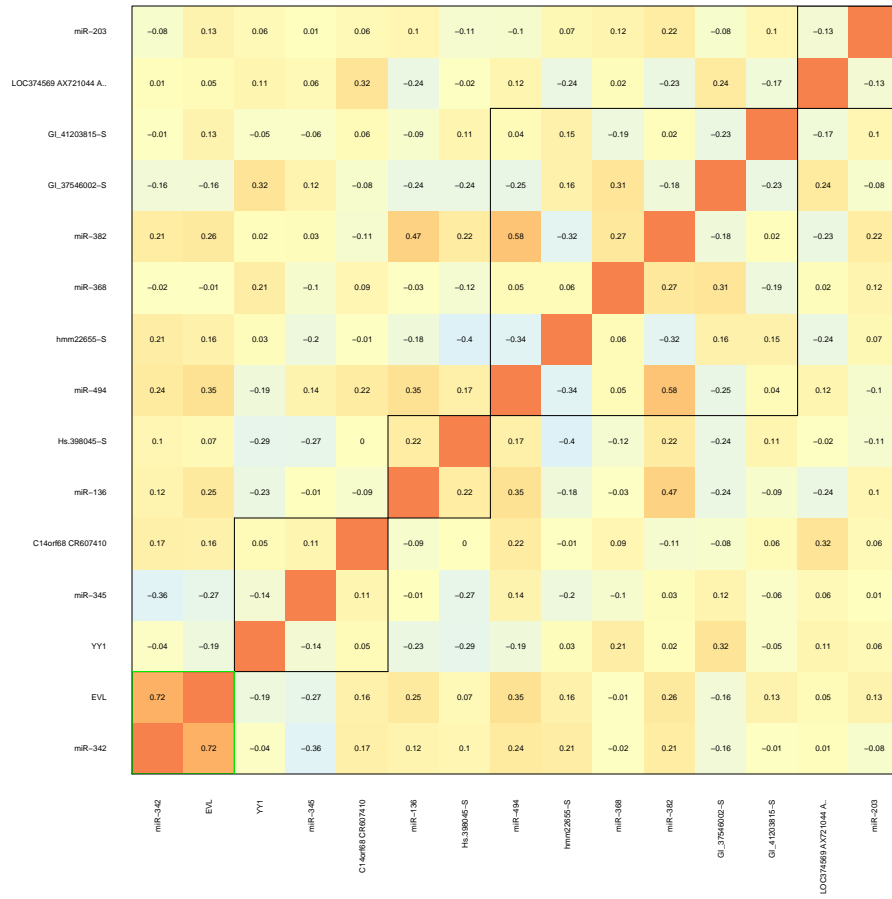

Chr 14 (-)

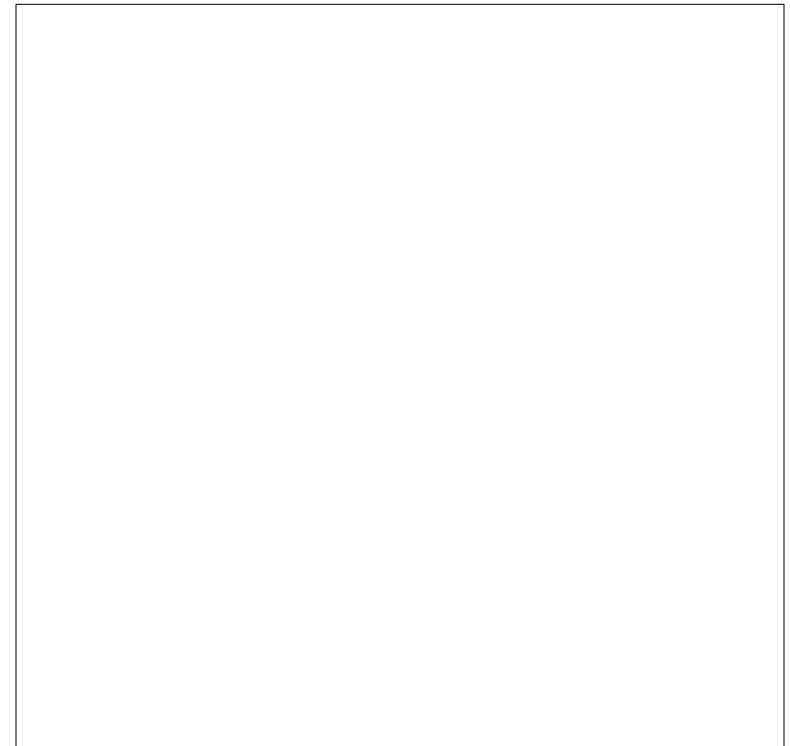

Chr 15 (+)

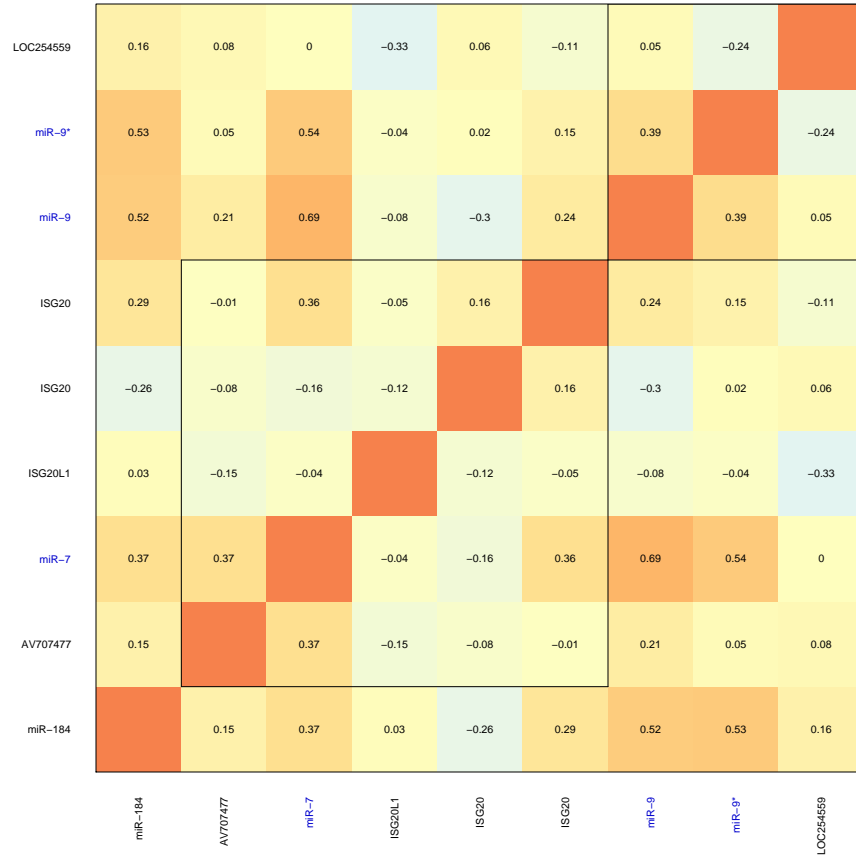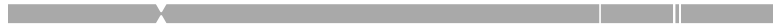

Chr 15 (-)

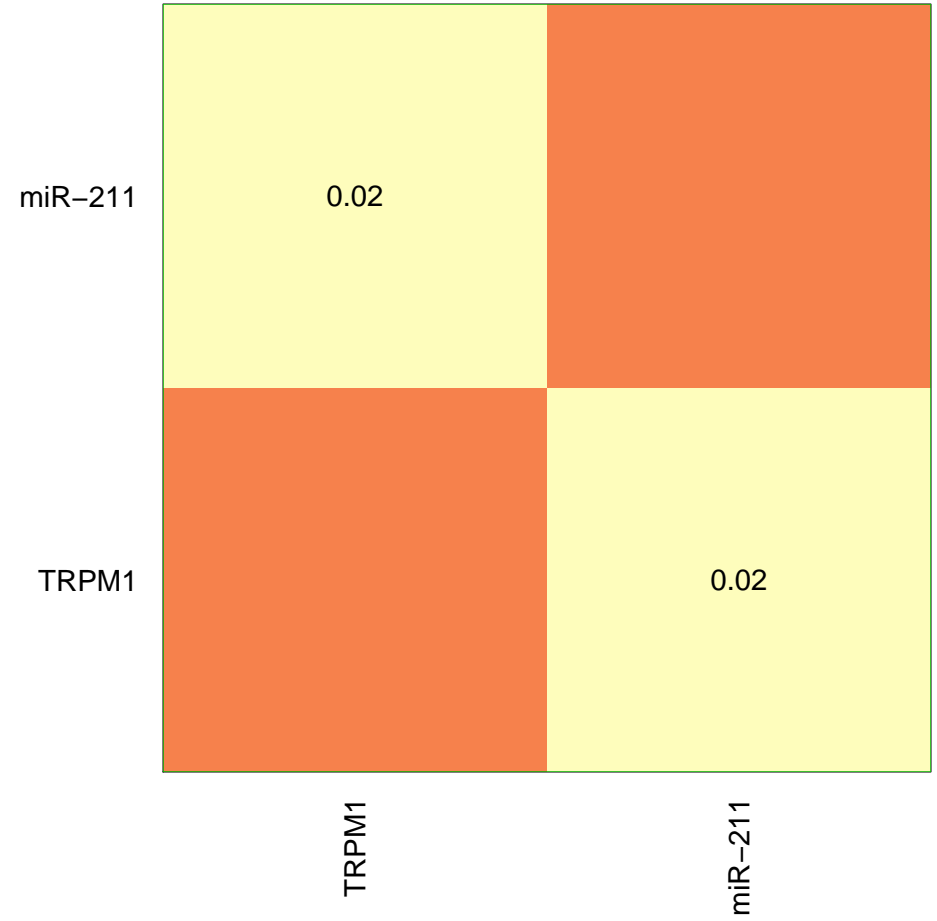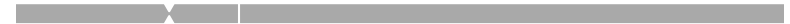

Chr 16 (+)

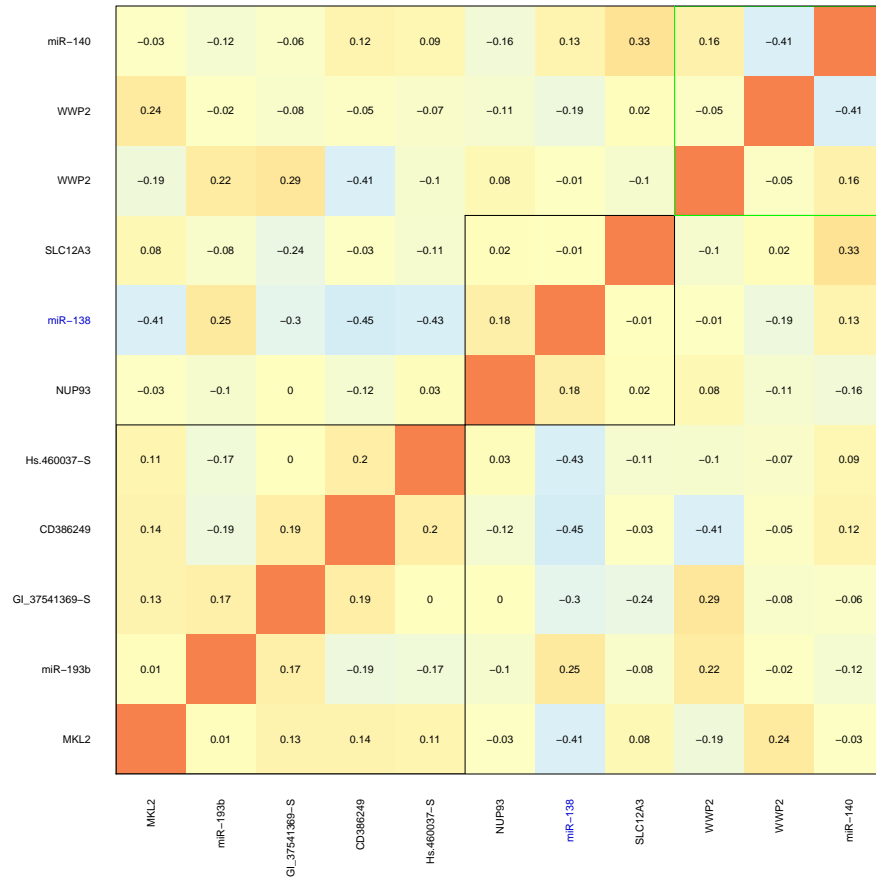

Chr 16 (-)

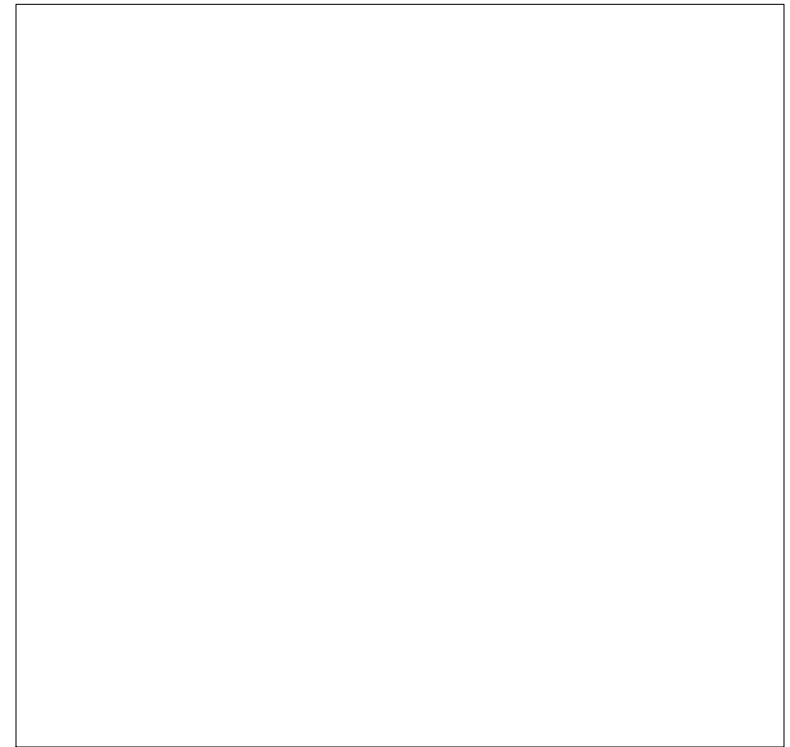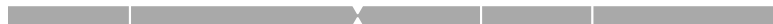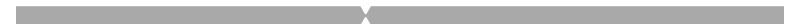



Chr 17 (+)

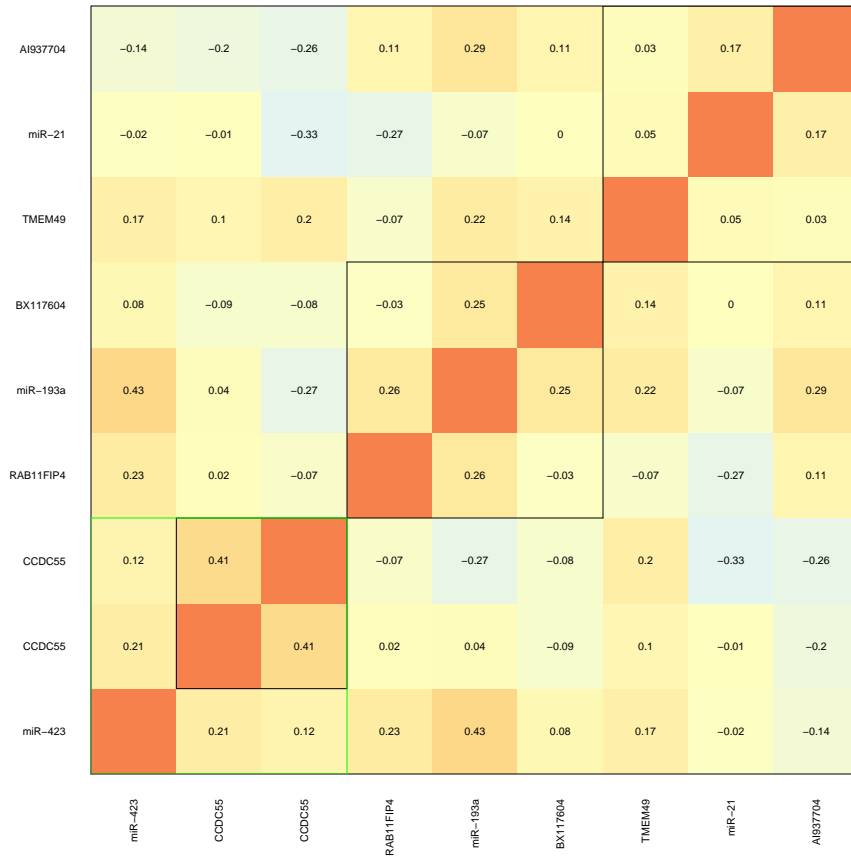

Chr 17 (-)

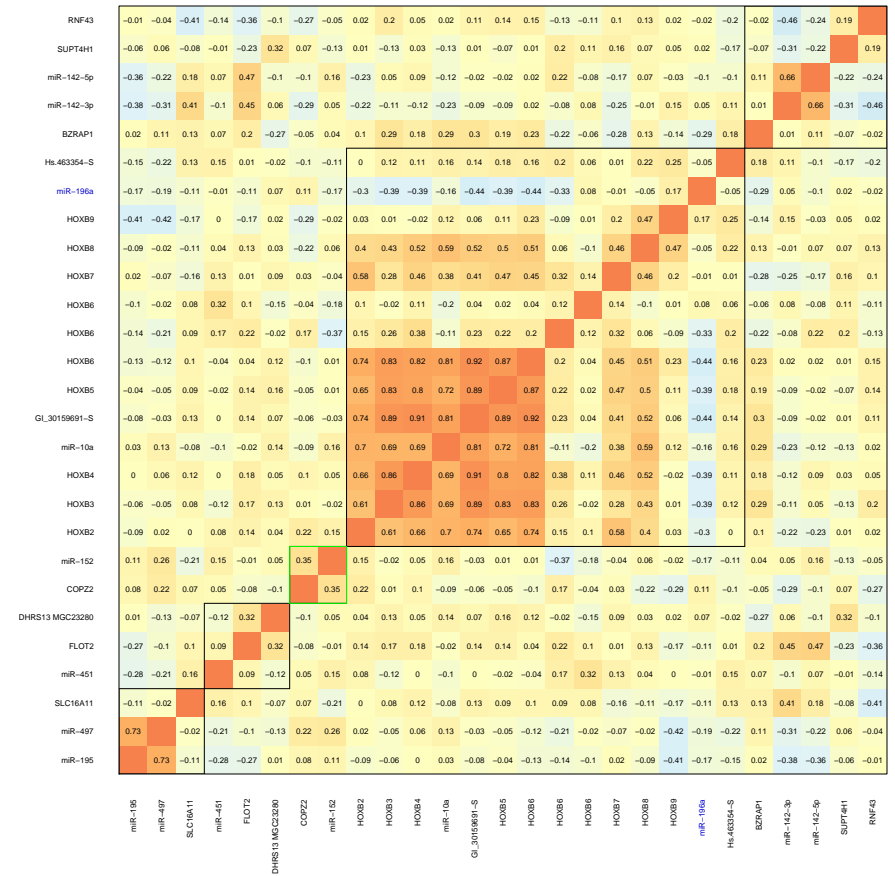

Chr 18 (+)

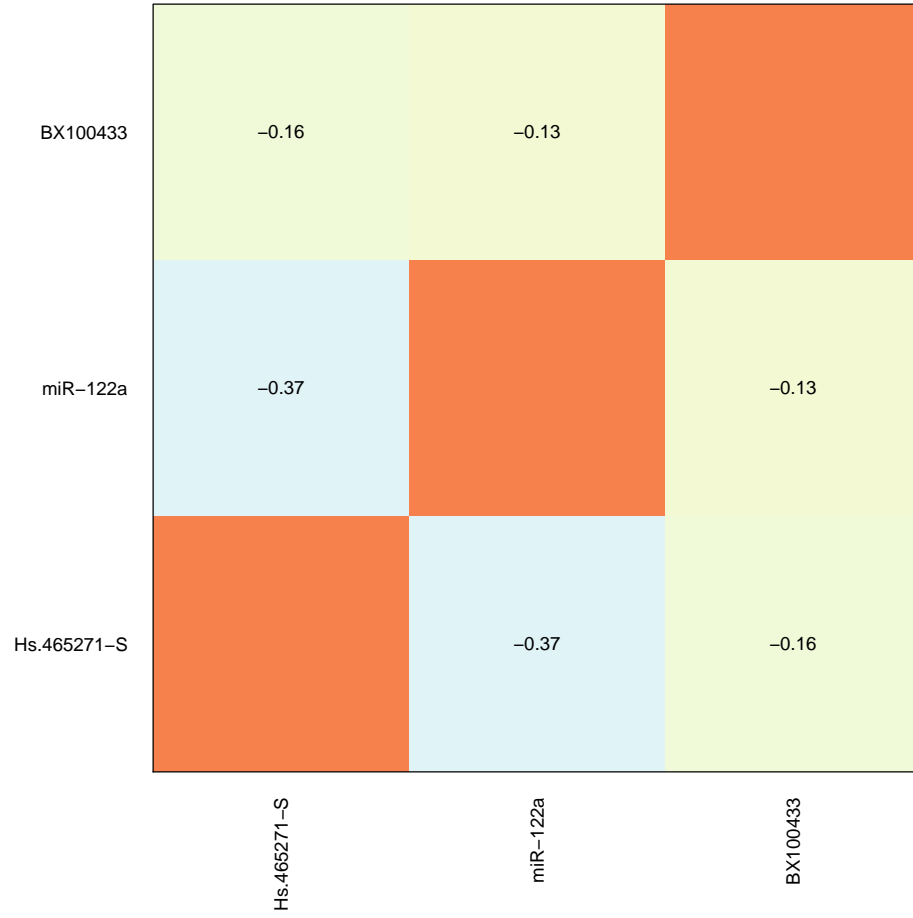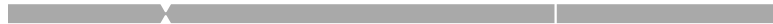

Chr 18 (-)

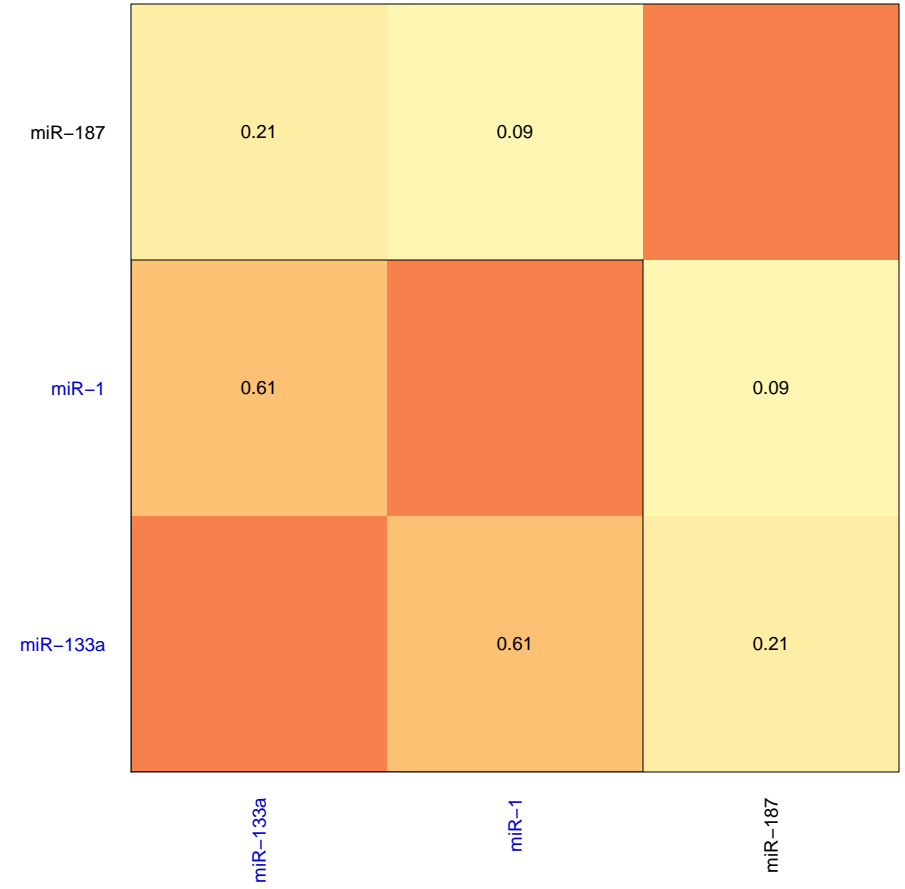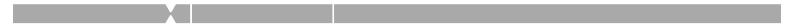

Chr 19 (+)

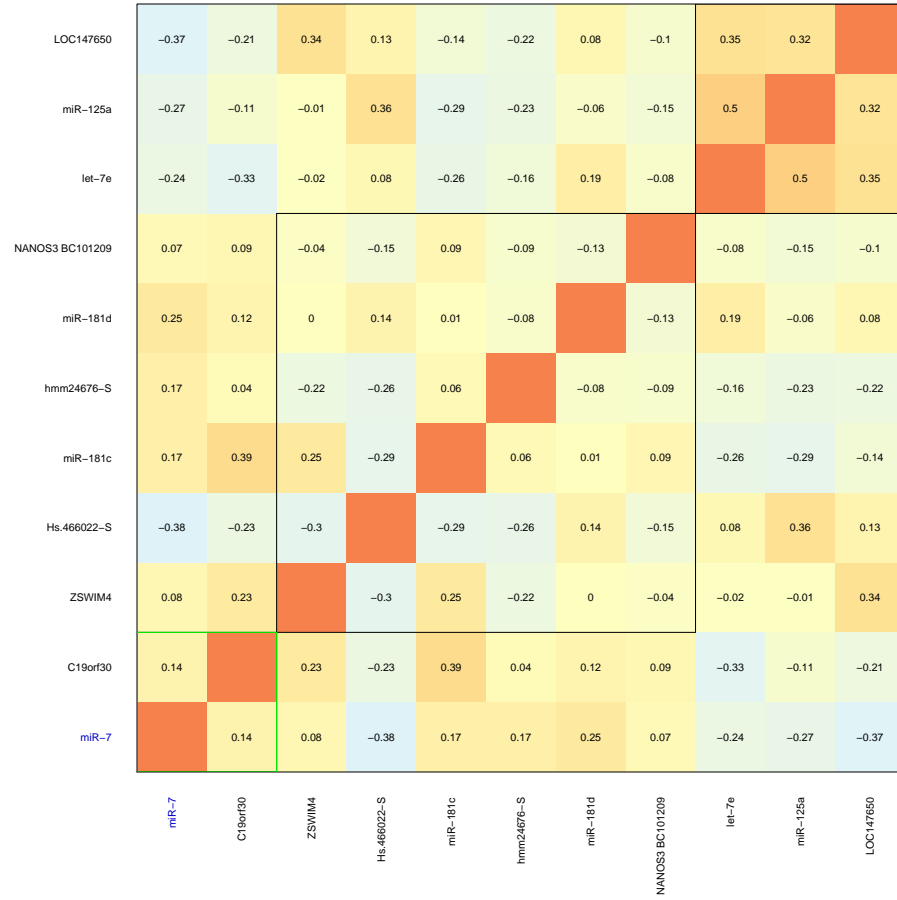

Chr 19 (-)

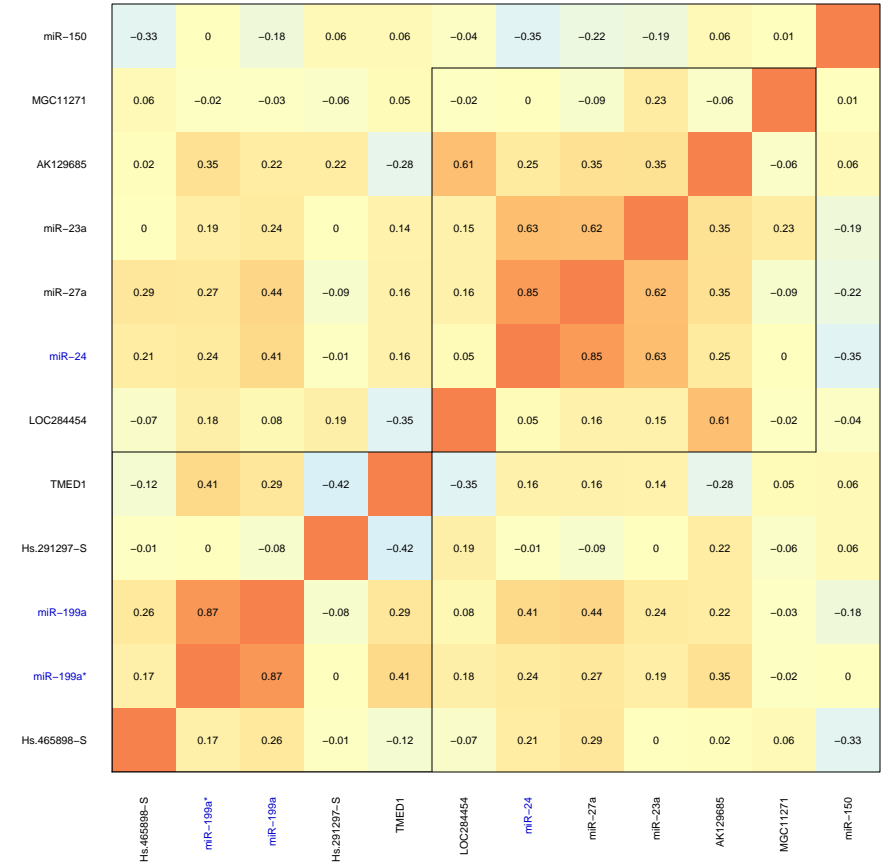

Chr 20 (+)

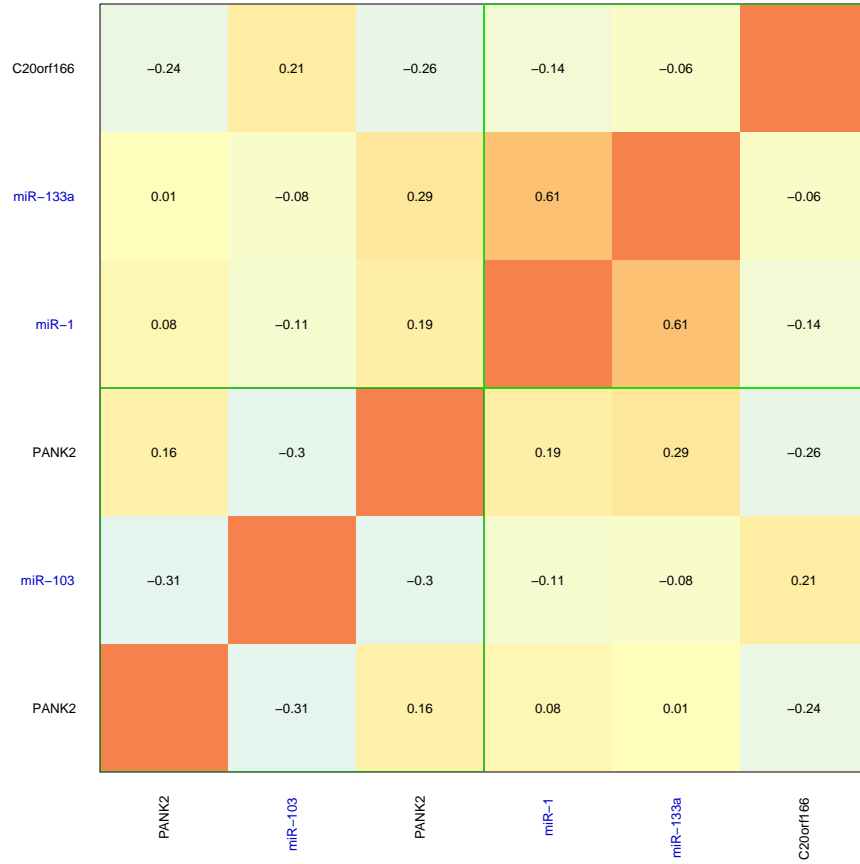

Chr 20 (-)

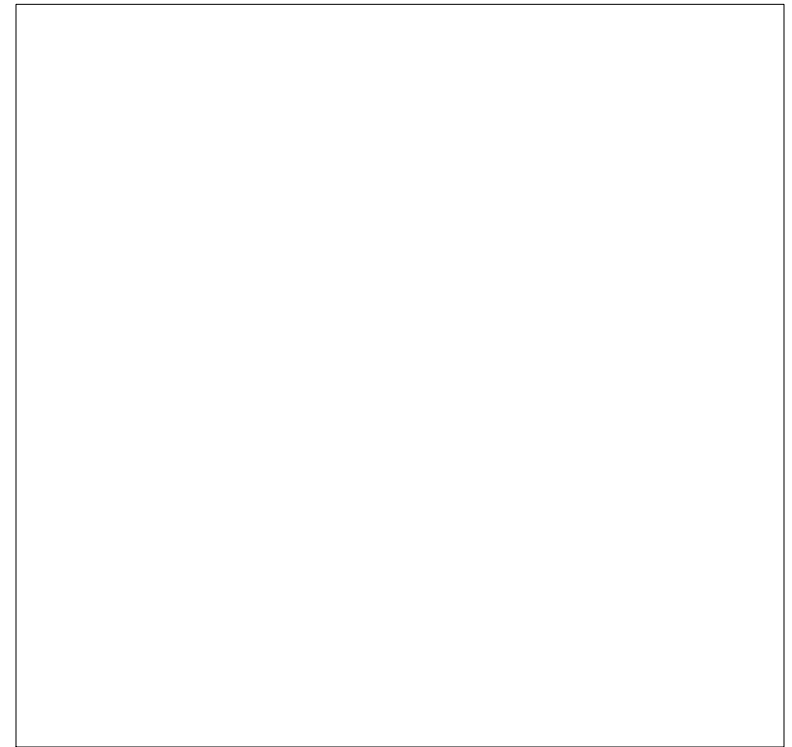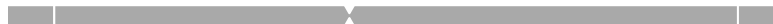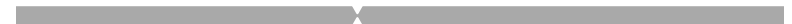

Chr 21 (+)

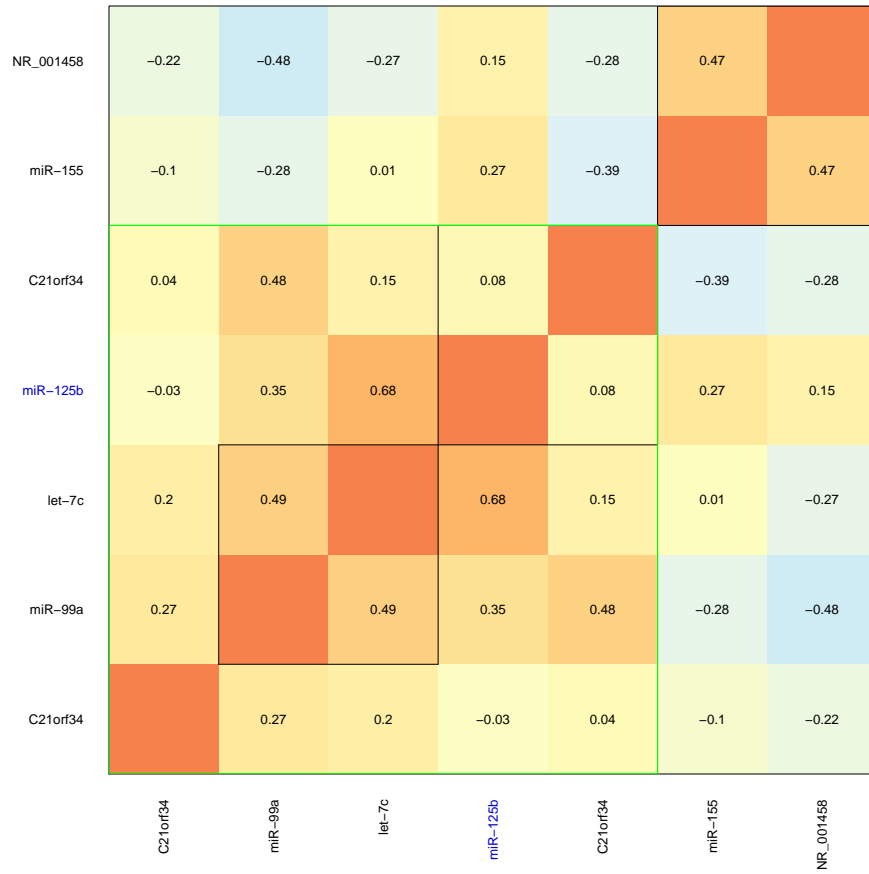

Chr 21 (-)

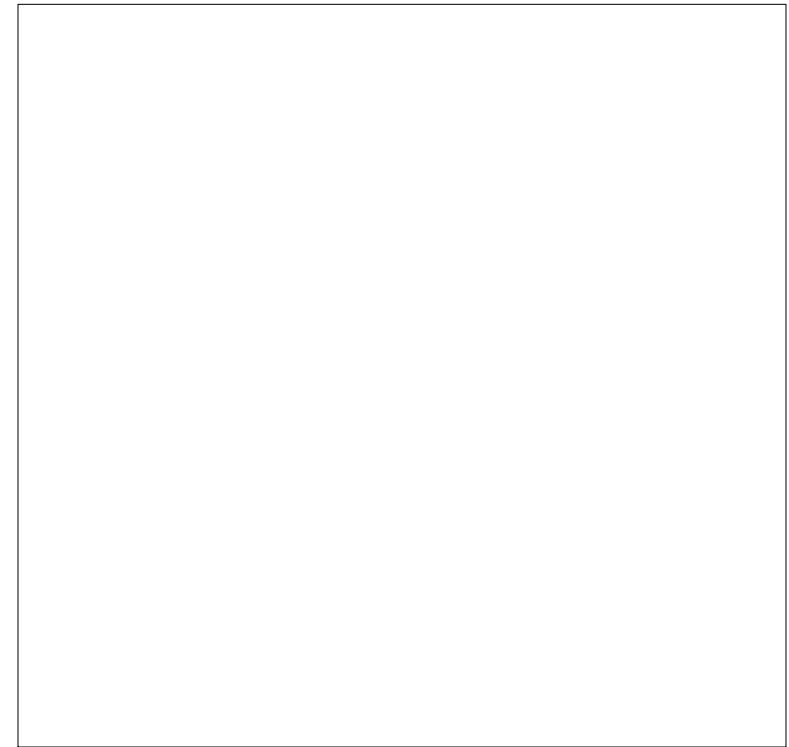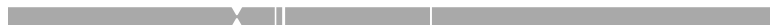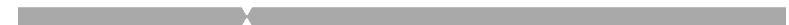

Chr 22 (+)

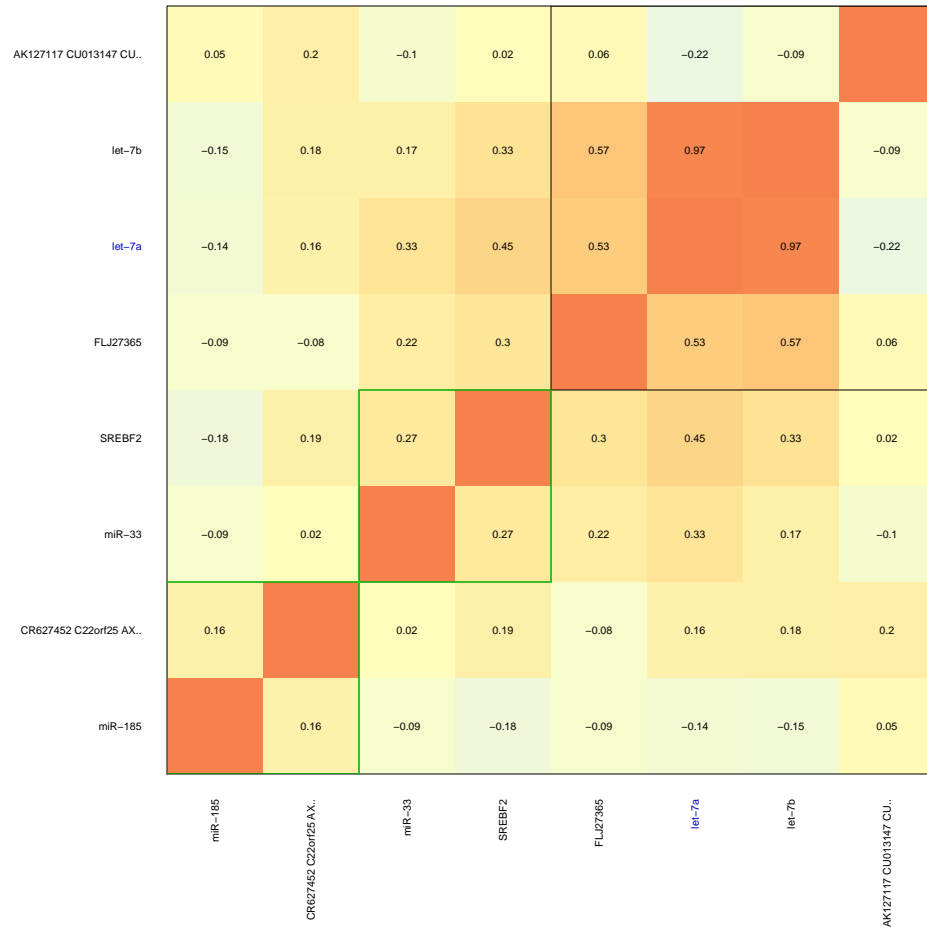

Chr 22 (-)

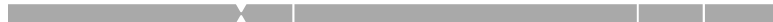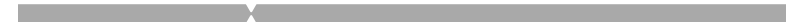

Supplement: gb-2007-8-10-r214-S13.pdf [file gb-2007-8-10-r214-S13.pdf]
