# Supplementary material for: MicroRNA expression profiling of human breast cancer identifies new markers of tumor subtype
Source: PubMed Central journal article supplement (PMC2246288; doi:10.1186/gb-2007-8-10-r214), 2007-10-08
Supplement: gb-2007-8-10-r214-S3.pdf [file gb-2007-8-10-r214-S3.pdf]

**A**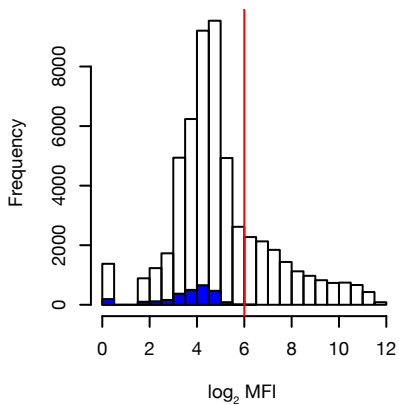**B**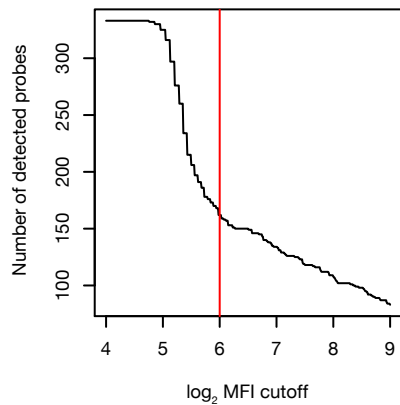

□ wells with sample material  
 ■ blank control wells

**C**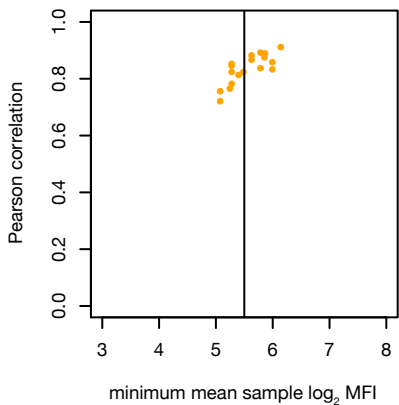**D**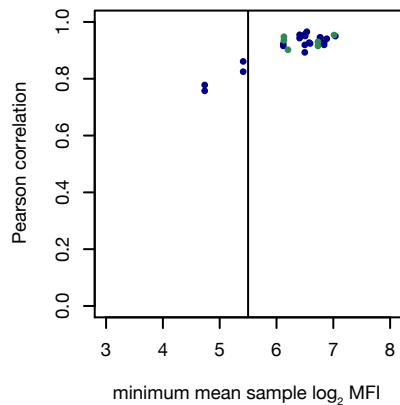

■ Cell lines  
 ■ Normals  
 ■ Tumours

**E**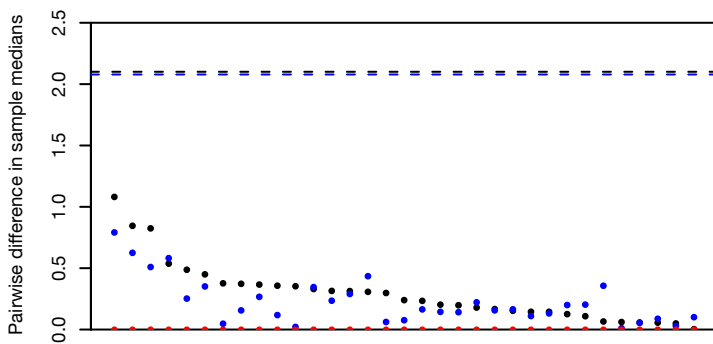

■ unnormalized  
 ■ control-based normalization  
 ■ sample median centering
