# Supplementary material for: MicroRNA expression profiling of human breast cancer identifies new markers of tumor subtype
Source: PubMed Central journal article supplement (PMC2246288; doi:10.1186/gb-2007-8-10-r214), 2007-10-08

**AGO1 (Subtype p=0.37, ER p=0.87)**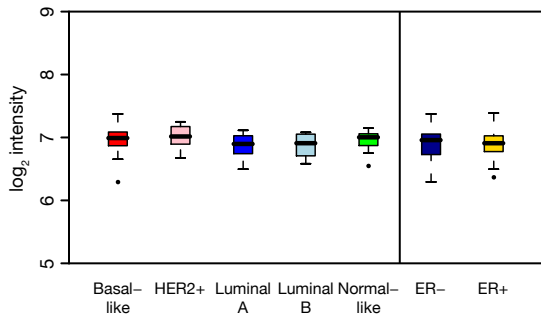**AGO2 (Subtype p=0.00013, ER p=0.00094)**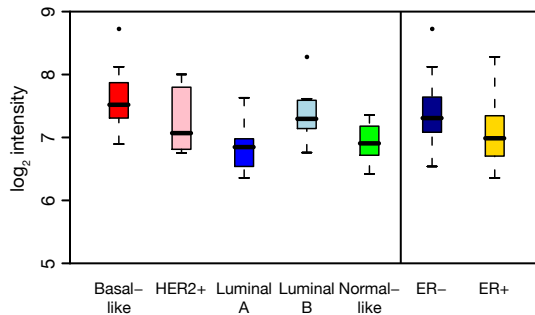**AGO3 (Subtype p=0.17, ER p=0.16)**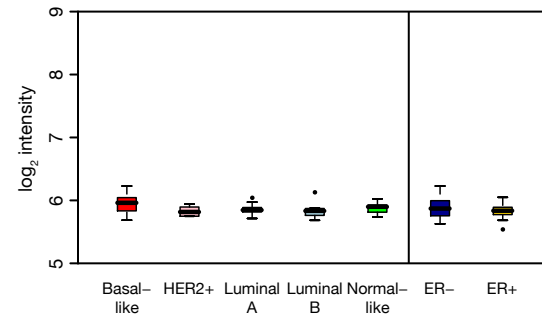**AGO3 (Subtype p=0.55, ER p=0.041)**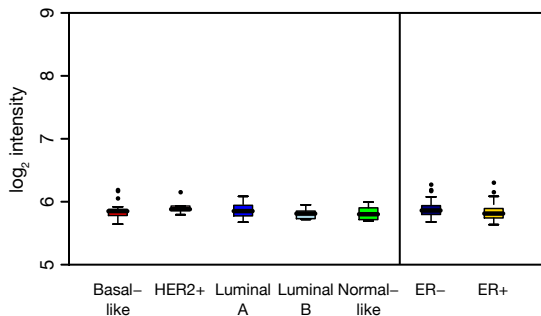**AGO4 (Subtype p=0.67, ER p=0.31)**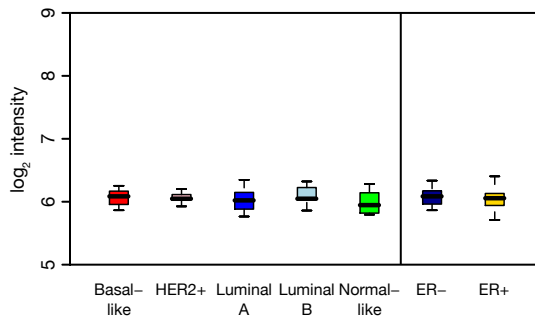**DGCR8 (Subtype p=0.22, ER p=0.34)**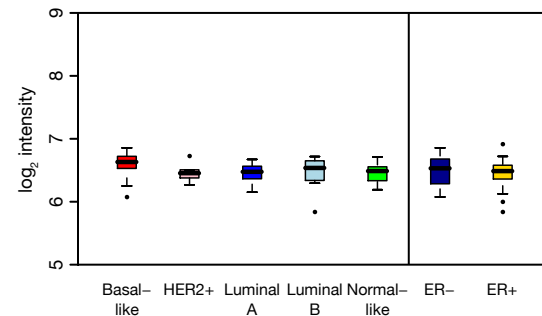**DICER1 (Subtype p=8e-04, ER p=0.014)**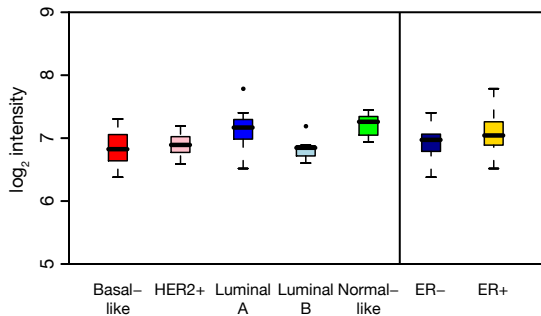**DROSHA (Subtype p=0.11, ER p=0.018)**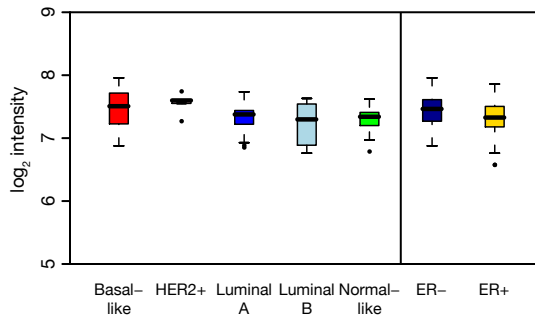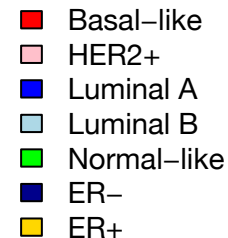

Supplement: gb-2007-8-10-r214-S10.pdf [file gb-2007-8-10-r214-S10.pdf]
