# Supplementary material for: MicroRNA expression profiling of human breast cancer identifies new markers of tumor subtype
Source: PubMed Central journal article supplement (PMC2246288; doi:10.1186/gb-2007-8-10-r214), 2007-10-08
Supplement: gb-2007-8-10-r214-S11.pdf [file gb-2007-8-10-r214-S11.pdf]

**AGO1  
(EIF2C1)**

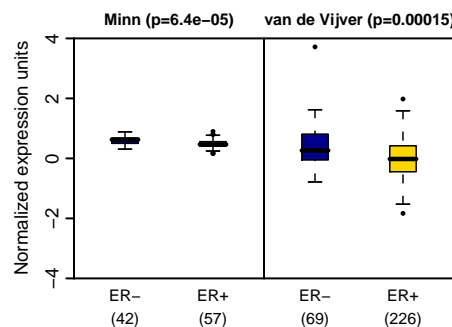

**AGO2  
(EIF2C2)**

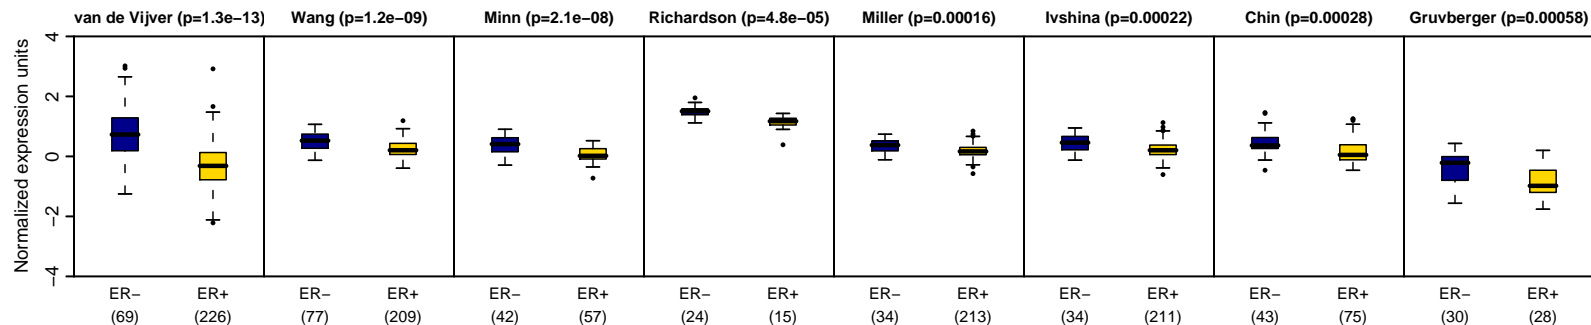

**DICER1**

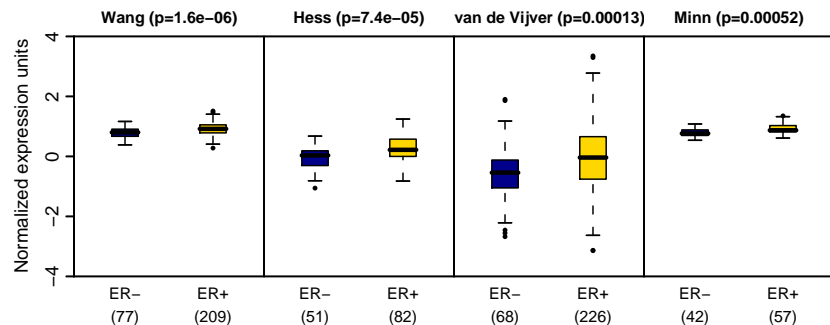

**DROSHA  
(RNASEN)**

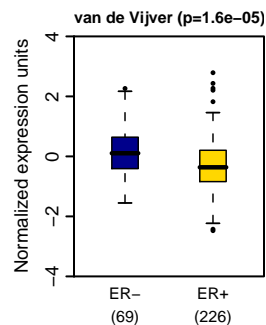

ER-  
ER+
