# Supplementary material for: MicroRNA expression profiling of human breast cancer identifies new markers of tumor subtype
Source: PubMed Central journal article supplement (PMC2246288; doi:10.1186/gb-2007-8-10-r214), 2007-10-08

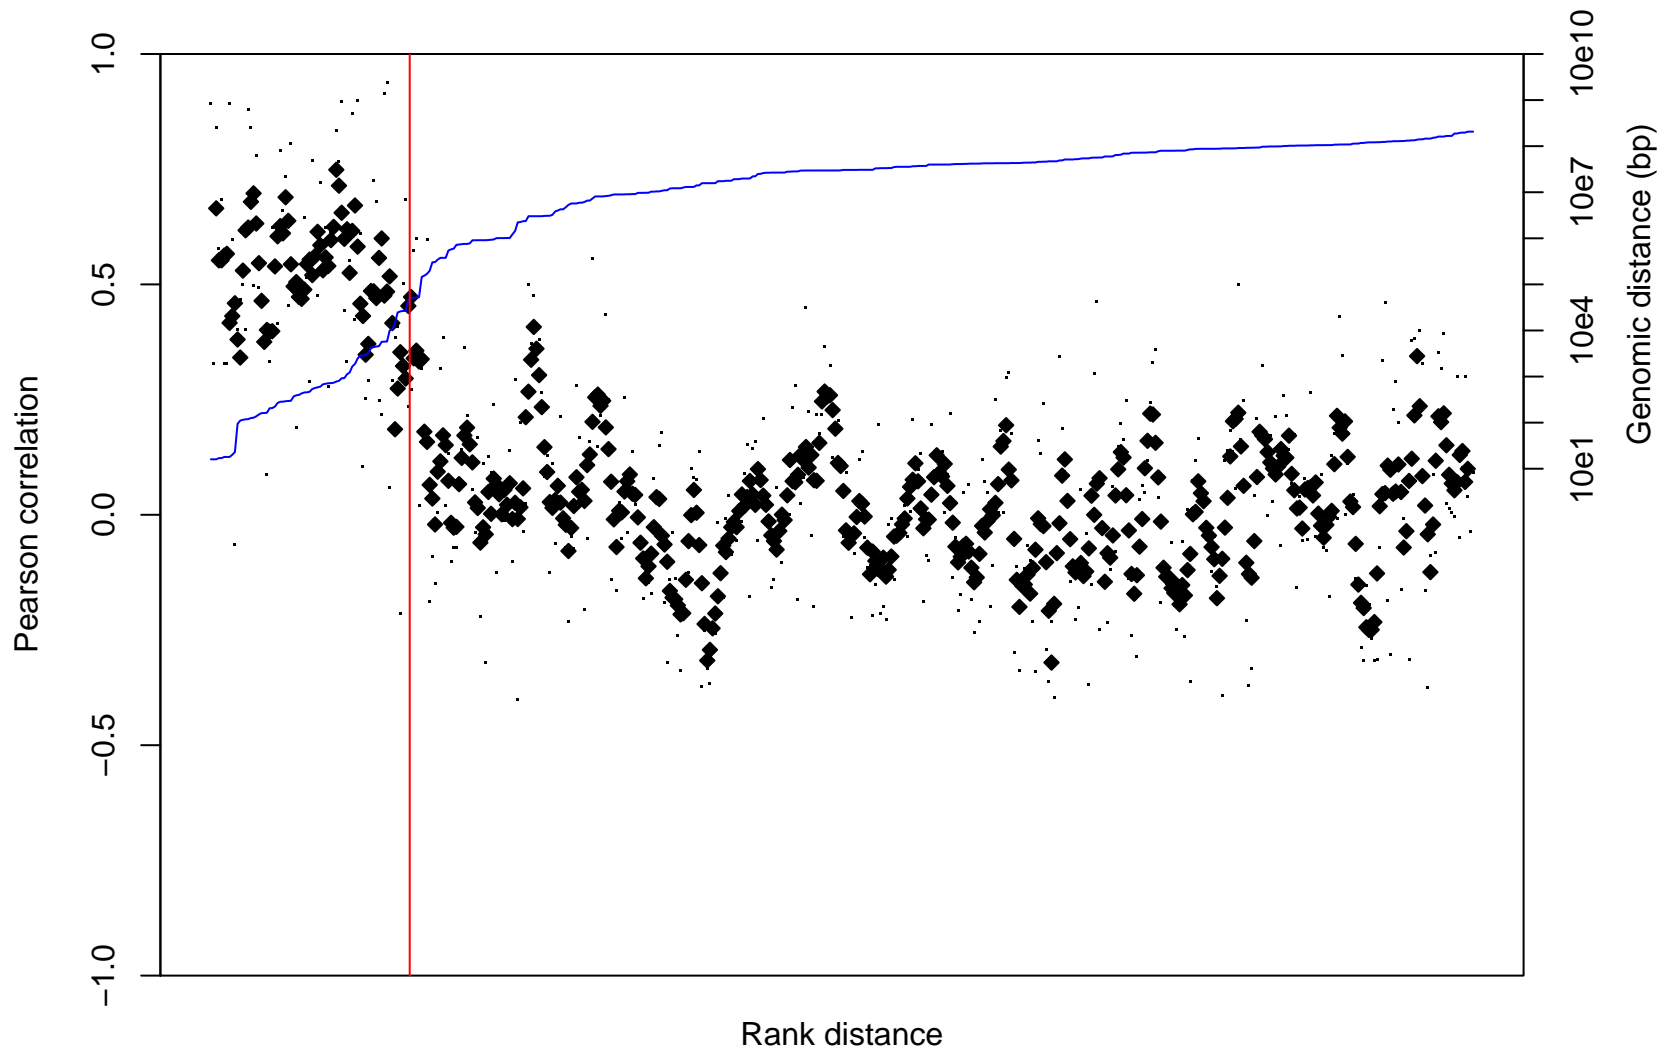

Supplement: gb-2007-8-10-r214-S12.pdf [file gb-2007-8-10-r214-S12.pdf]
